# Supplementary material for: Characterization of the Gut Microbiota in Urban Thai Individuals Reveals Enterotype-Specific Signature
Source: MDPI journal article supplement (doi:10.3390/microorganisms11010136), 2023-01-05
Supplement: s1 [file s1]

**Table S3: Amplicon sequence length distribution**

| Percentile | Sequence length after preprocessing |
|------------|-------------------------------------|
| 2%         | 252                                 |
| 9%         | 253                                 |
| 25%        | 253                                 |
| 50%        | 253                                 |
| 75%        | 253                                 |
| 91%        | 253                                 |
| 98%        | 254                                 |
