# Supplementary material for: Characterization of the Gut Microbiota in Urban Thai Individuals Reveals Enterotype-Specific Signature
Source: MDPI journal article supplement (doi:10.3390/microorganisms11010136), 2023-01-05
Supplement: s1 [file s1]

**Table S8: Number of taxa (nodes), interactions (edges), and average correlation in individual clusters**

| Cluster         | EnP   |       |                     | EnB   |       |                     |
|-----------------|-------|-------|---------------------|-------|-------|---------------------|
|                 | Nodes | Edges | Average correlation | Nodes | Edges | Average correlation |
| 1 <sup>st</sup> | 24    | 68    | 0.6168              | 7     | 2     | 0.5551              |
| 2 <sup>nd</sup> | 16    | 25    | 0.5879              | 1     | 0     | 0                   |
| 3 <sup>rd</sup> | 8     | 2     | 0.5416              | 2     | 0     | 0                   |
| 4 <sup>th</sup> | 19    | 18    | 0.5904              | 25    | 78    | 0.5790              |
| 5 <sup>th</sup> | -     | -     | -                   | 4     | 2     | 0.5382              |
| 6 <sup>th</sup> | -     | -     | -                   | 3     | 1     | 0.5107              |
