# Supplementary material for: Characterization of the Gut Microbiota in Urban Thai Individuals Reveals Enterotype-Specific Signature
Source: MDPI journal article supplement (doi:10.3390/microorganisms11010136), 2023-01-05
Supplement: s1 [file s1]

**Table S6: Association between microbial taxa present 1% relative abundance at least one sample, and diversity indices using Spearman's correlation coefficient.**

Values in the table: Correlation (P-value)

| <b>Taxa</b>                           | <b>Shannon</b>    | <b>Simpson</b>    | <b>Chao1</b>      | <b>Pielou</b>     |
|---------------------------------------|-------------------|-------------------|-------------------|-------------------|
| [Eubacterium] coprostanoligenes group | 0.572 (1.19E-09)* | 0.47 (1.39E-06)*  | 0.791 (9.98E-22)* | 0.498 (2.40E-07)* |
| [Eubacterium] eligens group           | 0.269 (0.008)*    | 0.221 (0.03)*     | 0.235 (0.021)*    | 0.256 (0.012)*    |
| [Eubacterium] ruminantium group       | 0.273 (0.007)*    | 0.219 (0.032)*    | 0.405 (4.19E-05)* | 0.224 (0.028)*    |
| [Eubacterium] xylanophilum group      | 0.497 (2.67E-07)* | 0.433 (1.04E-05)* | 0.502 (1.85E-07)* | 0.472 (1.22E-06)* |
| [Ruminococcus] gnavus group           | -0.125 (0.224)    | -0.117 (0.257)    | -0.236 (0.02)*    | -0.086 (0.406)    |
| [Ruminococcus] torques group          | 0.498 (2.41E-07)* | 0.453 (3.63E-06)* | 0.534 (2.17E-08)* | 0.472 (1.22E-06)* |
| Acidaminococcus                       | 0.031 (0.763)     | 0.039 (0.708)     | 0.146 (0.155)     | 0.002 (0.982)     |
| Akkermansia                           | 0.336 (8.27E-04)* | 0.276 (0.006)*    | 0.376 (1.57E-04)* | 0.322 (0.001)*    |
| Alistipes                             | 0.601 (9.95E-11)* | 0.496 (2.73E-07)* | 0.596 (1.43E-10)* | 0.568 (1.62E-09)* |
| Alloprevotella                        | 0.017 (0.866)     | -0.018 (0.86)     | 0.166 (0.105)     | -0.017 (0.871)    |
| Anaerosporebacter                     | 0.251 (0.014)*    | 0.27 (0.008)*     | 0.255 (0.012)*    | 0.237 (0.02)*     |
| Anaerostipes                          | 0.256 (0.012)*    | 0.243 (0.017)*    | 0.146 (0.155)     | 0.254 (0.013)*    |
| Anaerovibrio                          | 0.066 (0.526)     | 0.043 (0.681)     | 0.108 (0.295)     | 0.042 (0.684)     |
| Azospirillum sp. 47_25                | 0.163 (0.112)     | 0.154 (0.133)     | 0.112 (0.278)     | 0.154 (0.133)     |
| Bacteroides                           | 0.039 (0.707)     | 0.023 (0.824)     | -0.234 (0.022)*   | 0.098 (0.34)      |
| Barnesiella                           | 0.424 (1.69E-05)* | 0.364 (2.67E-04)* | 0.442 (6.65E-06)* | 0.412 (3.07E-05)* |
| Bifidobacterium                       | 0.471 (1.27E-06)* | 0.42 (2.07E-05)*  | 0.515 (7.98E-08)* | 0.42 (2.01E-05)*  |
| Bilophila                             | 0.341 (6.65E-04)* | 0.269 (0.008)*    | 0.246 (0.016)*    | 0.342 (6.43E-04)* |
| Blautia                               | 0.489 (4.41E-07)* | 0.422 (1.86E-05)* | 0.458 (2.78E-06)* | 0.461 (2.24E-06)* |
| Butyricicoccus                        | 0.318 (0.002)*    | 0.258 (0.011)*    | 0.199 (0.052)     | 0.34 (7.08E-04)*  |
| Butyricimonas                         | 0.477 (8.75E-07)* | 0.388 (9.45E-05)* | 0.533 (2.32E-08)* | 0.441 (6.79E-06)* |
| Christensenellaceae R-7 group         | 0.631 (5.62E-12)* | 0.529 (2.91E-08)* | 0.808 (2.78E-23)* | 0.553 (5.34E-09)* |
| Collinsella                           | 0.482 (6.67E-07)* | 0.474 (1.05E-06)* | 0.395 (6.91E-05)* | 0.478 (8.46E-07)* |
| Coprococcus 2                         | 0.373 (1.86E-04)* | 0.319 (0.002)*    | 0.519 (5.93E-08)* | 0.337 (7.92E-04)* |

| Taxa                          | Shannon           | Simpson           | Chao1              | Pielou            |
|-------------------------------|-------------------|-------------------|--------------------|-------------------|
| Desulfovibrio                 | 0.365 (2.58E-04)* | 0.277 (0.006)*    | 0.427 (1.43E-05)*  | 0.333 (9.23E-04)* |
| Dialister                     | 0.198 (0.053)     | 0.126 (0.222)     | 0.373 (1.84E-04)*  | 0.152 (0.14)      |
| Dorea                         | 0.522 (4.82E-08)* | 0.456 (3.10E-06)* | 0.589 (2.86E-10)*  | 0.478 (8.38E-07)* |
| Elusimicrobium                | -0.033 (0.751)    | -0.064 (0.537)    | 0.027 (0.795)      | -0.054 (0.604)    |
| Enterobacteriaceae            | 0.083 (0.424)     | 0.092 (0.371)     | -0.003 (0.98)      | 0.077 (0.453)     |
| Escherichia-Shigella          | 0.269 (0.008)*    | 0.253 (0.013)*    | 0.237 (0.02)*      | 0.271 (0.008)*    |
| Faecalibacterium              | 0.274 (0.007)*    | 0.345 (5.80E-04)* | 0.123 (0.231)      | 0.279 (0.006)*    |
| Flavonifractor                | 0.15 (0.146)      | 0.116 (0.26)      | -0.033 (0.752)     | 0.182 (0.077)     |
| Fusicatenibacter              | 0.598 (1.23E-10)* | 0.56 (2.89E-09)*  | 0.547 (8.19E-09)*  | 0.58 (5.86E-10)*  |
| Fusobacterium                 | -0.306 (0.002)*   | -0.226 (0.027)*   | -0.493 (3.40E-07)* | -0.237 (0.02)*    |
| Gastranaerophilales           | 0.127 (0.218)     | 0.096 (0.352)     | 0.218 (0.033)*     | 0.088 (0.395)     |
| Haemophilus                   | -0.085 (0.411)    | -0.019 (0.855)    | -0.108 (0.293)     | -0.096 (0.354)    |
| Hungatella                    | 0.029 (0.776)     | 0.037 (0.721)     | -0.037 (0.722)     | 0.049 (0.636)     |
| Lachnoclostridium             | 0.287 (0.005)*    | 0.264 (0.009)*    | -0.019 (0.856)     | 0.336 (8.08E-04)* |
| Lachnospira                   | 0.347 (5.39E-04)* | 0.273 (0.007)*    | 0.285 (0.005)*     | 0.328 (0.001)*    |
| Lachnospiraceae NK4A136 group | 0.47 (1.39E-06)*  | 0.452 (3.84E-06)* | 0.46 (2.47E-06)*   | 0.442 (6.43E-06)* |
| Lachnospiraceae UCG-001       | 0.463 (2.01E-06)* | 0.413 (2.94E-05)* | 0.49 (4.13E-07)*   | 0.442 (6.40E-06)* |
| Lachnospiraceae UCG-003       | 0.139 (0.176)     | 0.127 (0.219)     | 0.173 (0.092)      | 0.123 (0.233)     |
| Lachnospiraceae UCG-004       | 0.198 (0.053)     | 0.179 (0.08)      | 0.168 (0.102)      | 0.192 (0.061)     |
| Lachnospiraceae UCG-006       | 0.343 (6.34E-04)* | 0.348 (5.18E-04)* | 0.194 (0.059)      | 0.364 (2.61E-04)* |
| Lachnospiraceae UCG-010       | 0.507 (1.32E-07)* | 0.508 (1.30E-07)* | 0.486 (5.13E-07)*  | 0.497 (2.66E-07)* |
| Lachnospiraceae               | 0.462 (2.13E-06)* | 0.446 (5.22E-06)* | 0.192 (0.06)       | 0.511 (1.01E-07)* |
| Megamonas                     | 0.04 (0.7)        | 0.03 (0.775)      | 0.02 (0.85)        | 0.057 (0.579)     |
| Megasphaera                   | -0.079 (0.446)    | -0.102 (0.322)    | 0.121 (0.241)      | -0.121 (0.242)    |
| Mitsuokella                   | 0.15 (0.145)      | 0.138 (0.18)      | 0.171 (0.096)      | 0.136 (0.186)     |
| Muribaculaceae gut metagenome | 0.194 (0.058)     | 0.136 (0.187)     | 0.241 (0.018)*     | 0.18 (0.079)      |
| Muribaculaceae metagenome     | -0.094 (0.36)*    | -0.087 (0.401)    | -0.012 (0.91)      | -0.107 (0.299)    |
| Negativibacillus              | 0.412 (3.07E-05)* | 0.325 (0.001)*    | 0.582 (5.19E-10)*  | 0.363 (2.74E-04)* |
| Oscillibacter                 | 0.584 (4.34E-10)* | 0.488 (4.48E-07)* | 0.587 (3.28E-10)*  | 0.547 (7.81E-09)* |

| Taxa                                | Shannon           | Simpson            | Chao1             | Pielou             |
|-------------------------------------|-------------------|--------------------|-------------------|--------------------|
| Parabacteroides                     | 0.402 (5.02E-05)* | 0.345 (5.78E-04)*  | 0.274 (0.007)*    | 0.422 (1.82E-05)*  |
| Paraprevotella                      | 0.203 (0.047)*    | 0.129 (0.21)       | 0.302 (0.003)*    | 0.18 (0.08)        |
| Parasutterella                      | 0.106 (0.302)     | 0.07 (0.497)       | 0.084 (0.417)     | 0.098 (0.343)      |
| Phascolarctobacterium               | 0.225 (0.028)*    | 0.24 (0.019)*      | 0.068 (0.508)     | 0.243 (0.017)*     |
| Prevotella 2                        | 0.167 (0.103)     | 0.166 (0.107)      | 0.211 (0.039)*    | 0.122 (0.236)      |
| Prevotella 7                        | 0 (0.998)         | -0.003 (0.975)     | 0.047 (0.653)     | -0.029 (0.776)     |
| Prevotella 9                        | -0.316 (0.002)    | -0.336 (8.20E-04)* | 0.022 (0.829)     | -0.373 (1.85E-04)* |
| Prevotellaceae NK3B31 group         | 0.044 (0.672)     | 0.038 (0.716)      | 0.121 (0.242)     | 0.031 (0.766)      |
| Prevotellaceae UCG-001              | 0.111 (0.281)     | 0.102 (0.322)      | 0.15 (0.145)      | 0.098 (0.342)      |
| Rhodospirillales gut metagenome     | 0.142 (0.169)     | 0.134 (0.191)      | 0.128 (0.215)     | 0.132 (0.199)      |
| Romboutsia                          | 0.203 (0.047)*    | 0.234 (0.022)*     | 0.21 (0.04)*      | 0.178 (0.083)      |
| Roseburia                           | 0.376 (1.61E-04)* | 0.344 (6.07E-04)*  | 0.317 (0.002)*    | 0.359 (3.24E-04)*  |
| Ruminiclostridium 6                 | 0.44 (7.24E-06)*  | 0.397 (6.14E-05)*  | 0.483 (6.20E-07)* | 0.404 (4.42E-05)*  |
| Ruminococcaceae NK4A214 group       | 0.621 (1.45E-11)* | 0.523 (4.68E-08)*  | 0.788 (1.80E-21)* | 0.558 (3.52E-09)*  |
| Ruminococcaceae UCG-002             | 0.642 (1.79E-12)* | 0.567 (1.68E-09)*  | 0.798 (2.30E-22)* | 0.58 (6.09E-10)*   |
| Ruminococcaceae UCG-003             | 0.609 (4.43E-11)* | 0.565 (1.96E-09)*  | 0.62 (1.58E-11)*  | 0.568 (1.61E-09)*  |
| Ruminococcaceae UCG-005             | 0.664 (1.59E-13)* | 0.546 (8.74E-09)*  | 0.804 (5.69E-23)* | 0.6 (1.03E-10)*    |
| Ruminococcaceae UCG-010             | 0.537 (1.67E-08)* | 0.454 (3.31E-06)*  | 0.704 (1.27E-15)* | 0.473 (1.12E-06)*  |
| Ruminococcaceae UCG-014             | 0.42 (2.05E-05)*  | 0.377 (1.51E-04)*  | 0.453 (3.65E-06)* | 0.39 (8.52E-05)*   |
| Ruminococcus 1                      | 0.578 (6.73E-10)* | 0.499 (2.23E-07)*  | 0.676 (3.91E-14)* | 0.521 (5.30E-08)*  |
| Ruminococcus 2                      | 0.472 (1.17E-06)* | 0.43 (1.23E-05)*   | 0.324 (0.001)*    | 0.471 (1.28E-06)*  |
| Streptococcus                       | 0.244 (0.016)*    | 0.229 (0.025)      | 0.232 (0.023)*    | 0.221 (0.03)*      |
| Subdoligranulum                     | 0.586 (3.64E-10)* | 0.522 (4.80E-08)*  | 0.561 (2.72E-09)* | 0.545 (9.37E-09)*  |
| Succinivibrio                       | 0.045 (0.665)     | 0.066 (0.523)      | 0.091 (0.377)     | 0.023 (0.822)      |
| Sutterella                          | 0.302 (0.003)*    | 0.247 (0.015)*     | 0.222 (0.03)*     | 0.302 (0.003)*     |
| Tyzzereella                         | -0.042 (0.685)    | -0.032 (0.754)     | -0.21 (0.04)*     | 0.013 (0.904)      |
| uncultured Lachnospiraceae          | 0.609 (4.48E-11)* | 0.546 (8.82E-09)*  | 0.538 (1.63E-08)* | 0.602 (8.79E-11)*  |
| uncultured Muribaculaceae bacterium | 0.268 (0.008)*    | 0.208 (0.042)*     | 0.292 (0.004)*    | 0.247 (0.015)*     |

| Taxa                                                                                                      | Shannon           | Simpson           | Chao1             | Pielou            |
|-----------------------------------------------------------------------------------------------------------|-------------------|-------------------|-------------------|-------------------|
| uncultured Porphyromonadaceae bacterium                                                                   | 0.095 (0.359)     | 0.116 (0.26)      | 0.073 (0.478)     | 0.094 (0.36)      |
| uncultured Prevotellaceae                                                                                 | 0.142 (0.168)     | 0.134 (0.193)     | 0.17 (0.098)      | 0.118 (0.254)     |
| uncultured Puniceicoccaceae                                                                               | 0.314 (0.002)*    | 0.271 (0.008)*    | 0.38 (1.34E-04)*  | 0.297 (0.003)*    |
| uncultured Ruminococcaceae                                                                                | 0.446 (5.36E-06)* | 0.358 (3.44E-04)* | 0.603 (7.98E-11)* | 0.393 (7.56E-05)* |
| Veillonella                                                                                               | 0.023 (0.824)     | 0.067 (0.517)     | -0.12 (0.243)     | 0.056 (0.585)     |
| Victivallis                                                                                               | 0.422 (1.88E-05)* | 0.377 (1.52E-04)* | 0.549 (7.17E-09)* | 0.377 (1.53E-04)* |
| Number of significant taxa which have correlation in criteria ( $ \rho  \geq 0.35$ and p-value $< 0.05$ ) | 35                | 30                | 36                | 35                |
| Number of significant taxa which have positive correlation ( $\rho \geq 0.35$ and p-value $< 0.05$ )      | 35                | 30                | 35                | 34                |
| Number of significant taxa which have negative correlation ( $\rho \leq -0.35$ and p-value $< 0.05$ )     | 0                 | 0                 | 1                 | 1                 |
