# Supplementary material for: Characterization of the Gut Microbiota in Urban Thai Individuals Reveals Enterotype-Specific Signature
Source: MDPI journal article supplement (doi:10.3390/microorganisms11010136), 2023-01-05
Supplement: s1 [file s1]

**Table S5: Fisher's exact test of bacteria at least 1% abundance with age group, BMI level, gender, and enterotype**

The numbers shown in the table are p-values of Fisher's exact test between taxa and lifestyle variables. The asterisk (\*) indicates the significant p-value.

| Taxa                                  | Enterotype | Age group | Gender | BMI level |
|---------------------------------------|------------|-----------|--------|-----------|
| [Eubacterium] coprostanoligenes group | 1.000      | 0.485     | 0.206  | 0.934     |
| [Eubacterium] eligens group           | 0.005*     | 0.932     | 0.062  | 0.453     |
| [Eubacterium] ruminantium group       | 0.683      | 0.383     | 0.660  | 0.714     |
| [Eubacterium] xylanophilum group      | 1.000      | 0.333     | 1.000  | 1.000     |
| [Ruminococcus] gnavus group           | 1.000      | 0.656     | 1.000  | 0.100     |
| [Ruminococcus] torques group          | 0.551      | 1.000     | 1.000  | 0.718     |
| Acidaminococcus                       | 0.326      | 0.647     | 0.745  | 0.753     |
| Akkermansia                           | 0.713      | 0.512     | 1.000  | 0.469     |
| Alistipes                             | 0.003*     | 0.540     | 0.358  | 0.629     |
| Alloprevotella                        | 0.002*     | 0.083     | 0.106  | 0.791     |
| Anaerosporebacter                     | 1.000      | 1.000     | 1.000  | 1.000     |
| Anaerostipes                          | 1.000      | 0.333     | 1.000  | 1.000     |
| Anaerovibrio                          | 0.109      | 0.621     | 0.101  | 0.443     |
| Azospirillum sp. 47_25                | 1.000      | 1.000     | 1.000  | 1.000     |
| Bacteroides                           | 0.003*     | 0.327     | 0.323  | 0.898     |
| Barnesiella                           | 0.049*     | 0.397     | 0.429  | 0.380     |
| Bifidobacterium                       | 0.093      | 0.143     | 0.492  | 0.300     |
| Bilophila                             | 0.548      | 0.732     | 1.000  | 0.252     |
| Blautia                               | 0.262      | 0.643     | 0.709  | 0.627     |
| Butyricicoccus                        | 1.000      | 0.111     | 0.322  | 0.467     |
| Butyricimonas                         | 0.551      | 0.776     | 0.543  | 0.443     |
| Christensenellaceae R-7 group         | 0.373      | 0.320     | 0.763  | 0.172     |
| Collinsella                           | 0.551      | 1.000     | 1.000  | 0.323     |
| Coprococcus 2                         | 0.551      | 0.776     | 1.000  | 0.152     |
| Desulfovibrio                         | 0.660      | 0.434     | 0.660  | 0.779     |
| Dialister                             | 0.527      | 0.682     | 1.000  | 0.418     |

|                               |           |       |        |        |
|-------------------------------|-----------|-------|--------|--------|
| Dorea                         | 0.333     | 0.656 | 0.322  | 1.000  |
| Elusimicrobium                | 0.333     | 0.333 | 0.322  | 1.000  |
| Enterobacteriaceae            | 0.487     | 0.722 | 0.468  | 0.950  |
| Escherichia-Shigella          | 0.230     | 0.897 | 1.000  | 0.699  |
| Faecalibacterium              | 0.715     | 0.213 | 0.266  | 0.021* |
| Flavonifractor                | 0.551     | 0.776 | 0.543  | 0.718  |
| Fusicatenibacter              | 0.548     | 0.732 | 0.548  | 0.779  |
| Fusobacterium                 | 0.056     | 0.263 | 0.513  | 0.444  |
| Gastranaerophilales           | 0.109     | 1.000 | 0.543  | 0.718  |
| Haemophilus                   | 0.298     | 0.847 | 0.548  | 0.090  |
| Hungatella                    | 1.000     | 0.656 | 1.000  | 1.000  |
| Lachnoclostridium             | 0.017*    | 0.358 | 0.763  | 0.878  |
| Lachnospira                   | 0.011*    | 0.637 | 0.059  | 0.182  |
| Lachnospiraceae NK4A136 group | 0.059     | 0.091 | 0.451  | 0.423  |
| Lachnospiraceae UCG-001       | 1.000     | 0.333 | 1.000  | 1.000  |
| Lachnospiraceae UCG-003       | 0.333     | 1.000 | 0.322  | 0.467  |
| Lachnospiraceae UCG-004       | 0.551     | 0.476 | 0.543  | 0.020* |
| Lachnospiraceae UCG-006       | 0.551     | 0.111 | 0.322  | 0.467  |
| Lachnospiraceae UCG-010       | 0.548     | 0.732 | 1.000  | 0.109  |
| Lachnospiraceae               | 2.45E-05* | 0.708 | 0.793  | 0.565  |
| Megamonas                     | 1.000     | 0.139 | 0.349  | 0.520  |
| Megasphaera                   | 0.498     | 0.959 | 0.492  | 0.182  |
| Mitsuokella                   | 0.551     | 0.165 | 0.543  | 0.718  |
| Muribaculaceae gut metagenome | 1.000     | 0.111 | 0.322  | 0.467  |
| Muribaculaceae metagenome     | 0.662     | 0.796 | 0.323  | 0.708  |
| Negativibacillus              | 1.000     | 1.000 | 0.322  | 1.000  |
| Oscillibacter                 | 1.000     | 1.000 | 1.000  | 0.467  |
| Parabacteroides               | 0.001*    | 0.204 | 0.015* | 0.447  |
| Paraprevotella                | 0.017*    | 0.772 | 0.766  | 0.840  |
| Parasutterella                | 0.713     | 0.578 | 0.709  | 0.706  |

|                                         |           |           |       |       |
|-----------------------------------------|-----------|-----------|-------|-------|
| Phascolarctobacterium                   | 0.011*    | 0.744     | 0.632 | 0.686 |
| Prevotella 2                            | 6.90E-04* | 0.420     | 0.166 | 0.162 |
| Prevotella 7                            | 1.000     | 0.656     | 1.000 | 1.000 |
| Prevotella 9                            | 2.59E-18* | 0.965     | 1.000 | 0.835 |
| Prevotellaceae NK3B31 group             | 1.000     | 1.000     | 1.000 | 0.133 |
| Prevotellaceae UCG-001                  | 0.551     | 0.360     | 1.000 | 1.000 |
| Rhodospirillales gut metagenome         | 0.548     | 5.11E-04* | 0.548 | 0.339 |
| Romboutsia                              | 1.000     | 0.333     | 0.322 | 1.000 |
| Roseburia                               | 0.003*    | 0.610     | 1.000 | 0.763 |
| Ruminiclostridium 6                     | 0.548     | 0.621     | 1.000 | 1.000 |
| Ruminococcaceae NK4A214 group           | 1.000     | 0.448     | 0.097 | 0.844 |
| Ruminococcaceae UCG-002                 | 0.518     | 0.943     | 1.000 | 0.437 |
| Ruminococcaceae UCG-003                 | 0.174     | 0.789     | 0.660 | 0.481 |
| Ruminococcaceae UCG-005                 | 0.208     | 0.616     | 0.537 | 1.000 |
| Ruminococcaceae UCG-010                 | 0.333     | 1.000     | 0.322 | 0.467 |
| Ruminococcaceae UCG-014                 | 1.000     | 0.625     | 1.000 | 0.632 |
| Ruminococcus 1                          | 0.327     | 0.520     | 1.000 | 0.450 |
| Ruminococcus 2                          | 0.049*    | 0.458     | 0.429 | 0.706 |
| Streptococcus                           | 1.000     | 1.000     | 1.000 | 0.211 |
| Subdoligranulum                         | 0.047*    | 0.080     | 0.250 | 0.197 |
| Succinivibrio                           | 0.106     | 0.894     | 0.592 | 0.733 |
| Sutterella                              | 5.96E-05* | 0.873     | 0.651 | 0.401 |
| Tyzzereella                             | 0.551     | 1.000     | 0.543 | 0.718 |
| uncultured Lachnospiraceae              | 0.551     | 0.776     | 1.000 | 0.718 |
| uncultured Muribaculaceae bacterium     | 0.548     | 0.165     | 0.101 | 0.718 |
| uncultured Porphyromonadaceae bacterium | 1.000     | 1.000     | 0.543 | 0.152 |
| uncultured Prevotellaceae               | 0.329     | 1.000     | 0.656 | 0.627 |
| uncultured Puniceicoccaceae             | 1.000     | 1.000     | 1.000 | 0.467 |
| uncultured Ruminococcaceae              | 0.548     | 1.000     | 0.548 | 0.339 |

|                                             |       |       |       |        |
|---------------------------------------------|-------|-------|-------|--------|
| Veillonella                                 | 0.551 | 0.476 | 1.000 | 0.020* |
| Victivallis                                 | 1.000 | 1.000 | 1.000 | 1.000  |
| Number of significant taxa (p-value < 0.05) | 17    | 1     | 1     | 3      |
