# Supplementary material for: Characterization of the Gut Microbiota in Urban Thai Individuals Reveals Enterotype-Specific Signature
Source: MDPI journal article supplement (doi:10.3390/microorganisms11010136), 2023-01-05
Supplement: s1 [file s1]

**Table S7: Cluster number of belonging taxa**

| <b>Taxa</b>                                  | <b>EnP</b> | <b>EnB</b> | <b>Overall</b> |
|----------------------------------------------|------------|------------|----------------|
| D_5__Bifidobacterium                         | 1          | 1          | 1              |
| D_5__Collinsella                             | 1          | 2          | 1              |
| D_5__Bacteroides                             | 2          | 3          | 2              |
| D_5__Barnesiella                             | 2          | 4          | 1              |
| D_5__Butyricimonas                           | 2          | 4          | 1              |
| D_5__Muribaculaceae.gut.metagenome.          | 2          | 4          | 1              |
| D_5__Muribaculaceae.metagenome.              | 3          | 2          | 3              |
| D_5__uncultured.Porphyromonadaceae.bacterium | 4          | 5          | 1              |
| D_5__uncultured.Muribaculaceae.bacterium.    | 2          | 4          | 1              |
| D_5__Alloprevotella                          | 4          | 2          | 3              |
| D_5__Paraprevotella                          | 2          | 4          | 1              |
| D_5__Prevotella.2                            | 4          | 1          | 3              |
| D_5__Prevotella.7                            | 4          | 1          | 3              |
| D_5__Prevotella.9                            | 3          | 1          | 3              |
| D_5__Prevotellaceae.NK3B31.group             | 4          | 5          | 3              |
| D_5__Prevotellaceae.UCG.001                  | 1          | 2          | 1              |
| D_5__uncultured.Prevotellaceae.              | 4          | 2          | 3              |
| D_5__Alistipes                               | 2          | 1          | 1              |
| D_5__Parabacteroides                         | 2          | 1          | 1              |
| D_3__Gastranaerophilales.                    | 4          | 6          | 3              |
| D_5__Elusimicrobium                          | 4          | 1          | 3              |
| D_5__Streptococcus                           | 3          | 1          | 1              |
| D_5__Christensenellaceae.R.7.group           | 1          | 4          | 1              |
| D_5__Anaerosporobacter                       | 1          | 4          | 1              |
| D_5__Anaerostipes                            | 2          | 6          | 1              |
| D_5__Blautia                                 | 1          | 6          | 1              |
| D_5__Coprococcus.2                           | 4          | 4          | 1              |

|                                       |   |   |   |
|---------------------------------------|---|---|---|
| D_5__Dorea                            | 1 | 4 | 1 |
| D_5__Fusicatenibacter                 | 2 | 4 | 1 |
| D_5__Hungatella                       | 3 | 3 | 2 |
| D_5__Lachnoclostridium                | 2 | 6 | 1 |
| D_5__Lachnospira                      | 2 | 4 | 1 |
| D_5__Lachnospiraceae.NK4A136.group    | 1 | 6 | 1 |
| D_5__Lachnospiraceae.UGC.001          | 4 | 4 | 1 |
| D_5__Lachnospiraceae.UGC.003          | 1 | 4 | 1 |
| D_5__Lachnospiraceae.UGC.004          | 1 | 6 | 1 |
| D_5__Lachnospiraceae.UGC.006          | 2 | 6 | 1 |
| D_5__Lachnospiraceae.UGC.010          | 2 | 4 | 1 |
| D_5__Roseburia                        | 1 | 6 | 1 |
| D_5__Tyzzerella                       | 3 | 3 | 2 |
| D_5__.Eubacterium..eligens.group      | 1 | 2 | 1 |
| D_5__.Eubacterium..ruminantium.group  | 1 | 4 | 1 |
| D_5__.Eubacterium..xylanophilum.group | 1 | 4 | 1 |
| D_5__.Ruminococcus..gnavus.group      | 3 | 3 | 2 |
| D_5__.Ruminococcus..torques.group     | 1 | 4 | 1 |
| D_5__uncultured.Lachnospiraceae.      | 1 | 2 | 1 |
| D_4__Lachnospiraceae.                 | 2 | 6 | 1 |
| D_5__Romboutsia                       | 1 | 5 | 1 |
| D_5__Butyricicoccus                   | 2 | 6 | 1 |
| D_5__Faecalibacterium                 | 2 | 6 | 1 |
| D_5__Flavonifractor                   | 2 | 3 | 2 |
| D_5__Negativibacillus                 | 3 | 1 | 1 |
| D_5__Oscillibacter                    | 1 | 1 | 1 |
| D_5__Ruminiclostridium.6              | 1 | 4 | 1 |
| D_5__Ruminococcaceae.NK4A214.group    | 1 | 4 | 1 |
| D_5__Ruminococcaceae.UGC.002          | 1 | 4 | 1 |

|                                            |   |   |   |
|--------------------------------------------|---|---|---|
| D_5__Ruminococcaceae.UCG.003               | 2 | 4 | 1 |
| D_5__Ruminococcaceae.UCG.005               | 1 | 4 | 1 |
| D_5__Ruminococcaceae.UCG.010               | 1 | 4 | 1 |
| D_5__Ruminococcaceae.UCG.014               | 4 | 4 | 1 |
| D_5__Ruminococcus.1                        | 1 | 4 | 1 |
| D_5__Ruminococcus.2                        | 4 | 6 | 1 |
| D_5__Subdoligranulum                       | 2 | 4 | 1 |
| D_5__.Eubacterium..coprostanoligenes.group | 1 | 4 | 1 |
| D_5__uncultured.Ruminococcaceae.           | 4 | 4 | 1 |
| D_5__Acidaminococcus                       | 3 | 1 | 3 |
| D_5__Phascolarctobacterium                 | 4 | 2 | 1 |
| D_5__Anaerovibrio                          | 4 | 1 | 3 |
| D_5__Dialister                             | 3 | 1 | 3 |
| D_5__Megamonas                             | 3 | 2 | 3 |
| D_5__Megasphaera                           | 3 | 1 | 3 |
| D_5__Mitsuokella                           | 4 | 4 | 3 |
| D_5__Veillonella                           | 3 | 5 | 1 |
| D_5__Fusobacterium                         | 3 | 5 | 2 |
| D_5__Victivallis                           | 4 | 4 | 1 |
| D_5__Azospirillum.sp..47_25                | 1 | 2 | 1 |
| D_5__Rhodospirillales.gut.metagenome.      | 1 | 3 | 1 |
| D_5__Bilophila                             | 1 | 3 | 1 |
| D_5__Desulfovibrio                         | 1 | 4 | 1 |
| D_5__Succinivibrio                         | 4 | 1 | 3 |
| D_5__Parasutterella                        | 2 | 3 | 1 |
| D_5__Sutterella                            | 4 | 2 | 1 |
| D_5__Escherichia.Shigella                  | 2 | 5 | 1 |
| D_4__Enterobacteriaceae.                   | 4 | 5 | 1 |
| D_5__Haemophilus                           | 3 | 5 | 1 |

|                                   |   |   |   |
|-----------------------------------|---|---|---|
| D_5__uncultured.Puniceicoccaceae. | 4 | 4 | 1 |
| D_5__Akkermansia                  | 3 | 4 | 1 |
