# Supplementary material for: Characterization of the Gut Microbiota in Urban Thai Individuals Reveals Enterotype-Specific Signature
Source: MDPI journal article supplement (doi:10.3390/microorganisms11010136), 2023-01-05
Supplement: s1 [file s1]

**Table S1: Characteristics of lifestyle variables in Thai individuals**

P-values were derived from Fisher's exact test for testing the difference of lifestyle variables between enterotypes.

| Variable/Question                                | Answer                                                                                                                                                             | All                             | EnP                          | EnB                           | p-value |
|--------------------------------------------------|--------------------------------------------------------------------------------------------------------------------------------------------------------------------|---------------------------------|------------------------------|-------------------------------|---------|
| N                                                | -                                                                                                                                                                  | 96                              | 32                           | 64                            |         |
| Gender                                           | Male:Female                                                                                                                                                        | 29:61                           | 12:17                        | 17:44                         | 0.339   |
| Age                                              | 18 ≤ age ≤ 25:25 < age ≤ 35:35 < age ≤ 45:45 < age ≤ 55: > 55 years old<br>(mean ± sd)                                                                             | 20:29:31:6:4<br>(34.17 ± 10.57) | 6:10:10:2:1<br>(34.31±10.75) | 14:19:21:4:3<br>(34.10±10.56) | 0.972   |
| BMI                                              | Underweight (<18.5 kg/m <sup>2</sup> ):Normal (18.5-24.9 kg/m <sup>2</sup> ):Overweight (25-29.9 kg/m <sup>2</sup> ):Obese (>30 kg/m <sup>2</sup> )<br>(mean ± sd) | 9:48:23:10<br>(22.58 ± 3.68)    | 2:16:8:3<br>(22.78 ± 3.40)   | 7:32:15:7<br>(22.48 ± 3.82)   | 0.884   |
| What is your current dietary pattern?            | vegetable and meat:vegetable and meat but not consume raw meat:vegetarian food                                                                                     | 62:27:1                         | 22:7:0                       | 40:20:1                       | 0.586   |
| Do you take multi-vitamin?                       | yes:no                                                                                                                                                             | 65:23                           | 22:7                         | 43:16                         | 1.000   |
| How often do you have probiotics and prebiotics? | never:rarely (a few times per month):sometimes (1-2 times per week):usually (3-5 times per week):everyday                                                          | 2:41:27:14:5                    | 0:15:7:7:0                   | 2:26:20:7:5                   | 0.231   |
| What kind of drinking water do you mainly have?  | bottled water:tap water                                                                                                                                            | 73:10                           | 24:3                         | 49:7                          | 0.933   |
| How often do you exercise?                       | never:rarely (a few times per month):sometimes (1-2 times per                                                                                                      | 13:29:30:16:2                   | 5:9:8:6:1                    | 8:20:22:10:1                  | 0.824   |

|                                               |                                                                                                           |              |             |              |       |
|-----------------------------------------------|-----------------------------------------------------------------------------------------------------------|--------------|-------------|--------------|-------|
|                                               | week):usually (3-5 times per week):everyday                                                               |              |             |              |       |
| Do you exercise indoor or outdoor?            | indoor:outdoor:both:depend on season:never                                                                | 39:13:23:7:6 | 13:2:10:1:3 | 26:11:13:6:3 | 0.442 |
| How often do you smoke?                       | never:rarely (a few times per month):sometimes (1-2 times per week):usually (3-5 times per week):everyday | 85:2:1:1:0   | 27:1:0:0:0  | 58:1:1:1:0   | 0.786 |
| How often do you drink alcoholic beverage?    | never:rarely (a few times per month):sometimes (1-2 times per week):usually (3-5 times per week):everyday | 41:42:4:1:0  | 13:13:2:0:0 | 28:29:2:1:0  | 0.819 |
| How often do you use dental floss?            | never:rarely (a few times per month):sometimes (1-2 times per week):usually (3-5 times per week):everyday | 28:32:8:5:15 | 10:11:2:2:2 | 18:21:6:3:13 | 0.540 |
| How many hours a day do you sleep on average? | less than 5 hours:5-6 hours:6-7 hours:7-8 hours                                                           | 6:34:32:18   | 2:15:8:4    | 4:19:24:14   | 0.333 |
| How often do you poop?                        | less than one time per day:once a day:twice a day:three times a day:four times a day                      | 12:55:15:3:3 | 4:18:3:2:1  | 8:37:12:1:2  | 0.549 |
| What does your stool look like?               | quite liquid:normal:quite hard:cannot specify                                                             | 6:66:7       | 1:20:3      | 5:46:4       | 0.432 |
| When was the last time you took antibiotics?  | within 1 last week:within 1 last month:2-6 months ago:7 months - 1 year ago:more than 1 year/never        | 4:10:22:8:13 | 0:3:6:2:6   | 4:7:16:6:7   | 0.624 |
| When was your last influenza vaccination?     | within 1 last month:2-6 months ago:7 months - 1 year ago:more than 1 year/never                           | 1:8:6:18     | 0:2:1:5     | 1:6:5:13     | 0.795 |

|                                                                                                                                             |                                                                |          |         |         |       |
|---------------------------------------------------------------------------------------------------------------------------------------------|----------------------------------------------------------------|----------|---------|---------|-------|
| Are you taking or have you taken within the last 1 year any hormone regulator? (If used or using, please specify type of hormone regulator) | never:used or using (pills):used or using (drinks)             | 80:4:1   | 27:1:0  | 53:3:1  | 1.000 |
| In the past 6 months, how much has your body weight changed?                                                                                | change not more than 2 kg:change 2-5 kg :change more than 5 kg | 47:30:12 | 16:10:3 | 31:20:9 | 0.880 |
| Have you ever removed your tonsil?                                                                                                          | yes:no                                                         | 3:85     | 2:27    | 1:58    | 0.252 |
| Have you ever had appendectomy?                                                                                                             | yes:no                                                         | 10:79    | 3:26    | 7:53    | 1.000 |
| Are you currently taking any medication?                                                                                                    | yes:no                                                         | 14:72    | 5:22    | 9:50    | 0.757 |
| Were you born by caesarean section?                                                                                                         | yes:no(vaginal birth)                                          | 61:18    | 21:4    | 40:14   | 0.497 |
| What was your main food in your infant age (0-6 months)?                                                                                    | breast milk:formulated milk:both                               | 3:10:20  | 1:5:7   | 2:5:13  | 0.655 |
| Are you lactose intolerant?                                                                                                                 | yes:no                                                         | 9:74     | 1:27    | 8:47    | 0.261 |
| Are you gluten intolerant?                                                                                                                  | yes:no                                                         | 1:82     | 0:28    | 1:54    | 1.000 |
| Do you have any seasonal allergy?                                                                                                           | yes:no                                                         | 22:64    | 5:24    | 17:40   | 0.297 |

|                                                                                               |                                                                                                           |               |             |               |       |
|-----------------------------------------------------------------------------------------------|-----------------------------------------------------------------------------------------------------------|---------------|-------------|---------------|-------|
| How often do you cook by yourself?                                                            | never:rarely (a few times per month):sometimes (1-2 times per week):usually (3-5 times per week):everyday | 7:36:21:14:11 | 2:13:8:4:2  | 5:23:13:10:9  | 0.839 |
| How often do you have instant food?                                                           | never:rarely (a few times per month):sometimes (1-2 times per week):usually (3-5 times per week):everyday | 1:26:18:25:19 | 0:7:8:8:6   | 1:19:10:17:13 | 0.786 |
| How often do you have egg or meat?                                                            | never:rarely (a few times per month):sometimes (1-2 times per week):usually (3-5 times per week):everyday | 0:0:3:31:56   | 0:0:3:10:16 | 0:0:0:21:40   | 0.060 |
| How often do you have grain?                                                                  | never:rarely (a few times per month):sometimes (1-2 times per week):usually (3-5 times per week):everyday | 6:45:18:14:5  | 3:14:7:2:2  | 3:31:11:12:3  | 0.442 |
| How often do you have vegetable?                                                              | never:rarely (a few times per month):sometimes (1-2 times per week):usually (3-5 times per week):everyday | 1:13:30:25:20 | 1:5:12:6:5  | 0:8:18:19:15  | 0.367 |
| How often do you have dairy product?                                                          | never:rarely (a few times per month):sometimes (1-2 times per week):usually (3-5 times per week):everyday | 5:23:26:16:18 | 2:9:10:4:3  | 3:14:16:12:15 | 0.468 |
| How often do you have cow milk substitutes (e.g., soy milk, almond milk, and pistachio milk)? | never:rarely (a few times per month):sometimes (1-2 times per week):usually (3-5 times per week):everyday | 15:35:26:4:8  | 4:12:9:1:3  | 11:23:17:3:5  | 0.983 |

|                                                   |                                                                                                           |               |             |               |               |
|---------------------------------------------------|-----------------------------------------------------------------------------------------------------------|---------------|-------------|---------------|---------------|
| How often do you have sweet?                      | never:rarely (a few times per month):sometimes (1-2 times per week):usually (3-5 times per week):everyday | 0:16:34:23:14 | 0:4:13:7:4  | 0:12:21:16:10 | 0.828         |
| How often do you have red meat?                   | never:rarely (a few times per month):sometimes (1-2 times per week):usually (3-5 times per week):everyday | 9:16:28:22:13 | 2:9:6:8:4   | 7:7:22:14:9   | 0.201         |
| How often do you have poultry?                    | never:rarely (a few times per month):sometimes (1-2 times per week):usually (3-5 times per week):everyday | 1:5:33:42:6   | 1:0:15:10:3 | 0:5:18:32:3   | <b>0.040*</b> |
| How often do you have seafood?                    | never:rarely (a few times per month):sometimes (1-2 times per week):usually (3-5 times per week):everyday | 1:31:38:15:1  | 0:14:10:4:0 | 1:17:28:11:1  | 0.421         |
| How often do you have salty snack?                | never:rarely (a few times per month):sometimes (1-2 times per week):usually (3-5 times per week):everyday | 0:40:34:11:2  | 0:14:10:4:1 | 0:26:24:7:1   | 0.851         |
| How often do you have high sugar containing food? | never:rarely (a few times per month):sometimes (1-2 times per week):usually (3-5 times per week):everyday | 0:41:33:10:3  | 0:18:7:3:0  | 0:23:26:7:3   | 0.135         |
| Which part of egg do you eat?                     | whole:partial                                                                                             | 84:3          | 27:1        | 57:2          | 0.763         |
| How often do you drink soft drink?                | never:rarely (a few times per month):sometimes (1-2 times per                                             | 56:31:3:0:0   | 18:11:0:0:0 | 38:20:3:0:0   | 0.649         |

|                                                |                                                                                                           |               |            |              |       |
|------------------------------------------------|-----------------------------------------------------------------------------------------------------------|---------------|------------|--------------|-------|
|                                                | week):usually (3-5 times per week):everyday                                                               |               |            |              |       |
| How often do you have sweetener?               | never:rarely (a few times per month):sometimes (1-2 times per week):usually (3-5 times per week):everyday | 25:30:19:7:5  | 9:8:8:1:3  | 16:22:11:6:2 | 0.426 |
| How often do you drink 1 liter of water a day? | never:rarely (a few times per month):sometimes (1-2 times per week):usually (3-5 times per week):everyday | 1:10:19:19:39 | 1:5:7:5:11 | 0:5:12:14:28 | 0.388 |
