# Supplementary material for: Characterization of the Gut Microbiota in Urban Thai Individuals Reveals Enterotype-Specific Signature
Source: MDPI journal article supplement (doi:10.3390/microorganisms11010136), 2023-01-05
Supplement: s1 [file s1]

**Table S2: The number of reads remaining in each step of microbiome analysis**

| Parameters   | Raw       | Filtered  | Denoised  | Merged    | Non-chimeric |
|--------------|-----------|-----------|-----------|-----------|--------------|
| Minimum      | 37,029    | 26,814    | 26,611    | 26,388    | 25,299       |
| 1st Quartile | 59,533.75 | 44,776    | 44,488.5  | 43,248    | 35,618.5     |
| Median       | 68,379    | 51,598.5  | 50,896    | 48,359    | 40,109       |
| Mean         | 68,866.76 | 52,095.02 | 51,483.85 | 49,348.84 | 41,445.70    |
| 3rd Quartile | 75,320    | 57,094    | 56,231.25 | 54,329.75 | 44,936.25    |
| Maximum      | 120,475   | 95,353    | 94,667    | 92,983    | 86,823       |
| Total        | 6,611,209 | 5,001,122 | 4,942,450 | 4,737,489 | 3,978,787    |
