# Supplementary material for: Characterization of the Gut Microbiota in Urban Thai Individuals Reveals Enterotype-Specific Signature
Source: Microorganisms. 2023 Jan 5;11(1):136. doi: 10.3390/microorganisms11010136 (PMC9866083; doi:10.3390/microorganisms11010136)
Supplement: Supplementary file 1 [file microorganisms-11-00136-s001.zip]

Archive with 15 entries (15 files):
- Figure S1 - the association of gut microbiota and host lifestyle parameters using PCoA visualization.png
- Figure S2 - the clustering of gut microbiome profiles using hierarchical clustering analysis.PNG
- Figure S3 - identification of the highest correlated cluster in enterotypes.PNG
- Figure S4 - co-occurrence network of highly correlated clusters in both enterotypes.PNG
- Figure S5 - microbe¿Cmicrobe interactions of dominant taxa.PNG
- Table S1 - characteristics of lifestyle variables in Thai individuals.pdf
- Table S10 - statistical test for differences in diversity of age bmi gender.xlsx
- Table S2 - the number of reads remaining in each step of microbiome analysis.pdf
- Table S3 - amplicon sequence length distribution.pdf
- Table S4 - taxonomic abundance and diversity.xlsx
- Table S5 - Fisherí»s exact test of bacteria at least 1% abundance with age group, BMI level, gender, and enterotype.pdf
- Table S6 - association between microbial taxa and diversity indices using Spearmaní»s correlation coefficient.pdf
- Table S7 - cluster number of belonging taxa.pdf
- Table S8 - number of taxa (nodes), interactions (edges), and average correlation in individual clusters.pdf
- Table S9 - questionnaire.xlsx
