# Supplementary material for: Characterization of the Gut Microbiota in Urban Thai Individuals Reveals Enterotype-Specific Signature
Source: Microorganisms. 2023 Jan 5;11(1):136. doi: 10.3390/microorganisms11010136 (PMC9866083; doi:10.3390/microorganisms11010136)
Supplement: Supplementary file 1 [file microorganisms-11-00136-s001.zip › Table S9 - questionnaire.xlsx]

## Sheet: S9A - Questionnaire EN
No	Question	Type of Question	Choice 1	Choice 2	Choice 3	Choice 4	Choice 5	Choice 6
1	What is your current dietary pattern?	select 1 choice	vegetable and animal meat	vegetable and animal meat but not consume raw meat	strict vegetarian food (no egg and animal milk)	strict vegetarian food (no egg and animal milk) and seafood	vegetarian food	prefer not to answer
2	Do you take multi-vitamin?	select 1 choice	yes	no	prefer not to answer
3	How often do you have probiotics and prebiotics?	select 1 choice	never	rarely (a few times per month)	sometimes (1-2 times per week)	usually (3-5 times per week)	everyday	prefer not to answer
4	What kind of drinking water do you mainly have?	select 1 choice	bottled water	tap water	groundwater	not sure	prefer not to answer
5	Do you have any special food?	select at least 1 choice	raw meat	low-carb foods	halal	none of these choices
6	How often do you exercise?	select 1 choice	never	rarely (a few times per month)	sometimes (1-2 times per week)	usually (3-5 times per week)	everyday	prefer not to answer
7	Do you exercise indoor or outdoor?	select 1 choice	indoor	outdoor	both	depend on season	prefer not to answer
8	How often do you smoke?	select 1 choice	never	rarely (a few times per month)	sometimes (1-2 times per week)	usually (3-5 times per week)	everyday	prefer not to answer
9	How often do you drink alcoholic beverage?	select 1 choice	never	rarely (a few times per month)	sometimes (1-2 times per week)	usually (3-5 times per week)	everyday	prefer not to answer
10	Which alcohol do you drink?	select at least 1 choice	beer/cider	white wine	red wine	cocktail	liquor	others
11	How often do you brush your teeth?	select 1 choice	never	rarely (a few times per month)	sometimes (1-2 times per week)	usually (3-5 times per week)	everyday	prefer not to answer
12	How often do you use dental floss?	select 1 choice	never	rarely (a few times per month)	sometimes (1-2 times per week)	usually (3-5 times per week)	everyday	prefer not to answer
13	How many hours a day do you sleep on average?	select 1 choice	less than 5 hours	5-6 hours	6-7 hours	7-8 hours	more than 8 hours	prefer not to answer
14	How often do you poop?	select 1 choice	less than one time per day	once a day	twice a day	three times a day	four times a day	more than four times a day
15	What does your stool look like?	select 1 choice	quite liquid	normal	quite hard	cannot specify	prefer not to answer
16	When was the last time you took antibiotics?	select 1 choice	within 1 last week	within 1 last month	2-6 months ago	7 months - 1 year ago	more than 1 year/never	prefer not to answer
17	When was your last influenza vaccination?	select 1 choice	within 1 last week	within 1 last month	2-6 months ago	7 months - 1 year ago	more than 1 year/never	prefer not to answer
18	Are you taking or have you taken within the last 1 year any hormone regulator? (If used or using, please specify type of hormone regulator)	select 1 choice	never	used or using (pills)	used or using (drinks)	used or using (injection)	prefer not to answer
19	Are you getting pregnant?	select 1 choice	yes	no	prefer not to answer
20	In the past 6 months, how much has your body weight changed?	select 1 choice	change not more than 2 kg	change 2-5 kg	change more than 5 kg	prefer not to answer
21	Have you ever removed your tonsil?	select 1 choice	yes	no	prefer not to answer
22	Have you ever had appendectomy?	select 1 choice	yes	no	prefer not to answer
23	Are you currently taking any medication?	select 1 choice	yes	no	prefer not to answer
24	Were you born by caesarean section?	select 1 choice	yes	no	prefer not to answer
25	What was your main food in your infant age (0-6 months)?	select 1 choice	breast milk	formulated milk	both	prefer not to answer
26	Are you lactose intolerant?	select 1 choice	yes	no	prefer not to answer
27	Are you gluten intolerant?	select 1 choice	yes	no	prefer not to answer
28	Are there any other things which can cause your allergic symptoms apart from foods?	select at least 1 choice	pet	wild animal	ivy	flower	sunlight	prefer not to answer
29	Do you have any seasonal allergy?	select 1 choice	yes	no	prefer not to answer
30	Are you having these underlying diseases?	select at least 1 choice	diabetes	hypertension	gastrointestinal inflammation	migraine	prefer not to answer
31	How often do you cook by yourself?	select 1 choice	never	rarely (a few times per month)	sometimes (1-2 times per week)	usually (3-5 times per week)	everyday	prefer not to answer
32	How often do you have instant food?	select 1 choice	never	rarely (a few times per month)	sometimes (1-2 times per week)	usually (3-5 times per week)	everyday	prefer not to answer
33	How often do you have egg or meat?	select 1 choice	never	rarely (a few times per month)	sometimes (1-2 times per week)	usually (3-5 times per week)	everyday	prefer not to answer
34	How often do you have grain?	select 1 choice	never	rarely (a few times per month)	sometimes (1-2 times per week)	usually (3-5 times per week)	everyday	prefer not to answer
35	How often do you have vegetable?	select 1 choice	never	rarely (a few times per month)	sometimes (1-2 times per week)	usually (3-5 times per week)	everyday	prefer not to answer
36	How often do you have dairy product?	select 1 choice	never	rarely (a few times per month)	sometimes (1-2 times per week)	usually (3-5 times per week)	everyday	prefer not to answer
37	How often do you have cow milk substitutes (e.g., soy milk, almond milk, and pistachio milk)?	select 1 choice	never	rarely (a few times per month)	sometimes (1-2 times per week)	usually (3-5 times per week)	everyday	prefer not to answer
38	How often do you have sweet?	select 1 choice	never	rarely (a few times per month)	sometimes (1-2 times per week)	usually (3-5 times per week)	everyday	prefer not to answer
39	How often do you have red meat?	select 1 choice	never	rarely (a few times per month)	sometimes (1-2 times per week)	usually (3-5 times per week)	everyday	prefer not to answer
40	How often do you have poultry?	select 1 choice	never	rarely (a few times per month)	sometimes (1-2 times per week)	usually (3-5 times per week)	everyday	prefer not to answer
41	How often do you have seafood?	select 1 choice	never	rarely (a few times per month)	sometimes (1-2 times per week)	usually (3-5 times per week)	everyday	prefer not to answer
42	How often do you have salty snack?	select 1 choice	never	rarely (a few times per month)	sometimes (1-2 times per week)	usually (3-5 times per week)	everyday	prefer not to answer
43	How often do you have high sugar containing food?	select 1 choice	never	rarely (a few times per month)	sometimes (1-2 times per week)	usually (3-5 times per week)	everyday	prefer not to answer
44	Which part of egg do you eat?	select 1 choice	whole	partial	prefer not to answer
45	How often do you drink soft drink?	select 1 choice	never	rarely (a few times per month)	sometimes (1-2 times per week)	usually (3-5 times per week)	everyday	prefer not to answer
46	How often do you have sweetener?	select 1 choice	never	rarely (a few times per month)	sometimes (1-2 times per week)	usually (3-5 times per week)	everyday	prefer not to answer
47	How often do you drink 1 liter of water a day?	select 1 choice	never	rarely (a few times per month)	sometimes (1-2 times per week)	usually (3-5 times per week)	everyday	prefer not to answer

## Sheet: S9B - Questionnaire TH
ลำดับ	คำถาม	ชนิดของคำถาม	ตัวเลือก 1	ตัวเลือก 2	ตัวเลือก 3	ตัวเลือก 4	ตัวเลือก 5	ตัวเลือก 6
1	คุณเลือกรับประทานอาหารประเภทใด?	เลือก 1 ข้อ	พืชและสัตว์	พืชและสัตว์ แต่ไม่ทานเนื้อที่ไม่สุก	เจ	เจและอาหารทะเล	มังสวิรัติ	ไม่ต้องการตอบ
2	คุณรับประทานวิตามินรวมหรือไม่?	เลือก 1 ข้อ	ใช่	ไม่ใช่	ไม่ต้องการตอบ
3	คุณรับประทาน Probiotics และ Prebiotics หรือไม่?	เลือก 1 ข้อ	ไม่เคย	น้อยครั้ง (ไม่กี่ครั้งต่อเดือน)	บางครั้ง (1-2 ครั้งต่อสัปดาห์)	สม่ำเสมอ (3-5 ครั้งต่อสัปดาห์)	เป็นประจำทุกวัน	ไม่ต้องการตอบ
4	คุณรับประทานน้ำจากแหล่งใดเป็นหลัก?	เลือก 1 ข้อ	น้ำดื่มบรรจุภัณฑ์	น้ำประปา	บ่อน้ำ	ไม่แน่ใจ	ไม่ต้องการตอบ
5	คุณรับประทานอาหารพิเศษเหล่านี้หรือไม่?	เลือกอย่างน้อย 1 ข้อ	เนื้อดิบ	อาหารควบคุมคาร์โบไฮเดรต	ฮาลาล	ท่านไม่ได้ทานสิ่งเหล่านี้
6	คุณออกกำลังกายบ่อยแค่ไหน?	เลือก 1 ข้อ	ไม่เคย	น้อยครั้ง (ไม่กี่ครั้งต่อเดือน)	บางครั้ง (1-2 ครั้งต่อสัปดาห์)	สม่ำเสมอ (3-5 ครั้งต่อสัปดาห์)	เป็นประจำทุกวัน	ไม่ต้องการตอบ
7	โดยปกติแล้วคุณออกกำลังกายภายในหรือภายนอกอาคาร?	เลือก 1 ข้อ	ภายในอาคาร	ภายนอกอาคาร	ทั้งภายในละภายนอกอาคาร	ขึ้นอยู่กับฤดูกาล	ไม่ต้องการตอบ
8	คุณสูบบุหรี่บ่อยเพียงใด?	เลือก 1 ข้อ	ไม่เคย	น้อยครั้ง (ไม่กี่ครั้งต่อเดือน)	บางครั้ง (1-2 ครั้งต่อสัปดาห์)	สม่ำเสมอ (3-5 ครั้งต่อสัปดาห์)	เป็นประจำทุกวัน	ไม่ต้องการตอบ
9	คุณดื่มเครื่องดื่มที่มีแอลกอฮอล์เป็นส่วนผสมบ่อยเพียงใด?	เลือก 1 ข้อ	ไม่เคย	น้อยครั้ง (ไม่กี่ครั้งต่อเดือน)	บางครั้ง (1-2 ครั้งต่อสัปดาห์)	สม่ำเสมอ (3-5 ครั้งต่อสัปดาห์)	เป็นประจำทุกวัน	ไม่ต้องการตอบ
10	เครื่องดื่มแอลกอฮอล์ประเภทใดที่คุณเลือกดื่ม?	เลือกอย่างน้อย 1 ข้อ	เบียร์ / ไซเดอร์	ไวน์ขาว	ไวน์แดง	ค็อกเทล	สุรา / แอลกอฮอล์ที่รุนแรง	แอลกอฮอล์ประเภพอื่นๆ
11	คุณแปรงฟันบ่อยแค่ไหน?	เลือก 1 ข้อ	ไม่เคย	น้อยครั้ง (ไม่กี่ครั้งต่อเดือน)	บางครั้ง (1-2 ครั้งต่อสัปดาห์)	สม่ำเสมอ (3-5 ครั้งต่อสัปดาห์)	เป็นประจำทุกวัน	ไม่ต้องการตอบ
12	คุณใช้ไหมขัดฟันบ่อยแค่ไหน?	เลือก 1 ข้อ	ไม่เคย	น้อยครั้ง (ไม่กี่ครั้งต่อเดือน)	บางครั้ง (1-2 ครั้งต่อสัปดาห์)	สม่ำเสมอ (3-5 ครั้งต่อสัปดาห์)	เป็นประจำทุกวัน	ไม่ต้องการตอบ
13	โดยเฉลี่ยแล้วคุณนอนกี่ชั่วโมงต่อวัน?	เลือก 1 ข้อ	น้อยกว่า 5 ชั่วโมง	5-6 ชั่วโมง	6-7 ชั่วโมง	7-8 ชั่วโมง	8 ชั่วโมงหรือมากกว่า	ไม่ต้องการตอบ
14	คุณเข้าห้องน้ำเพื่อถ่ายบ่อยเพียงใดในแต่ละวัน?	เลือก 1 ข้อ	น้อยกว่า 1 ครั้ง	1 ครั้ง	2 ครั้ง	3 ครั้ง	4 ครั้ง	มากกว่า 4ครั้ง
15	โดยปกติลักษณะของอุจาระของคุณเป็นแบบไหน?	เลือก 1 ข้อ	ฉันถ่ายเหลวเพราะท้องเสีย	ฉันมีอาการถ่ายยาก	ฉันถ่ายปกติ	ไม่สามารถระบุได้	ไม่ต้องการตอบ
16	ฉันรับประทานยาปฏิชีวนะในช่วงเวลา_______________ที่ผ่านมา?	เลือก 1 ข้อ	ภายใน 1 สัปดาห์	ภายใน 1 เดือน	2-6 เดือน	7เดือน-1ปี	นานกว่า 1 ปี/ไม่เคย	ไม่ต้องการตอบ
17	ฉันได้รับวัคซีนไข้หวัดใหญ่ในช่วงเวลา_______________ที่ผ่านมา?	เลือก 1 ข้อ	ภายใน 1 สัปดาห์	ภายใน 1 เดือน	2-6 เดือน	7เดือน-1ปี	นานกว่า 1 ปี/ไม่เคย	ไม่ต้องการตอบ
18	คุณใช้ยาหรือสารที่ใช้ควบคุมฮอร์โมนหรือไม่?	เลือก 1 ข้อ	ไม่ใช้	ใช้แบบเม็ด	ใช้แบบน้ำ	ใช้ในรูปแบบของการฉีดเข้าเส้นเลือด	ไม่ต้องการตอบ
19	คุณกำลังตั้งครรภ์อยู่หรือไม่?	เลือก 1 ข้อ	ใช่	ไม่ใช่	ไม่ต้องการตอบ
20	น้ำหนักของฉัน_______________ในช่วง 6 เดือนที่ผ่านมา?	เลือก 1 ข้อ	คงที่ (เพิ่มขึ้น/ลดลงน้อยกว่า 2 กิโลกรัม)	เพิ่มขึ้น/ลดลงน้อย2- 5 กิโลกรัม	เพิ่มขึ้น/ลดลงมากกว่า 5 กิโลกรัม	ไม่ต้องการตอบ
21	คุณเคยผ่าตัดต่อมทอมซิลหรือไม่?	เลือก 1 ข้อ	ใช่	ไม่ใช่	ไม่ต้องการตอบ
22	คุณเคยผ่าตัดไส้ติ่งหรือไม่?	เลือก 1 ข้อ	ใช่	ไม่ใช่	ไม่ต้องการตอบ
23	ในขณะนี้คุณมีการใช้ยาทั้งที่แพทย์สั่งและไม่ใช่ สำหรับอาการอื่นๆหรือไม?	เลือก 1 ข้อ	ใช่	ไม่ใช่	ไม่ต้องการตอบ
24	คุณเกิดโดยการผ่าคลอดหรือไม่?	เลือก 1 ข้อ	ใช่	ไม่ใช่	ไม่ต้องการตอบ
25	ขณะคุณเด็กคุณทานน้ำนมแม่หรือไม่?	เลือก 1 ข้อ	น้ำนมจากแม่	อาหารสำหรับเด็กแรกเกิด	อาหารสำหรับเด็กแรกเกิดและน้ำนมจากแม่	ไม่ต้องการตอบ
26	คุณมีอาการแพ้แลคโตส (Lactose) หรือไม่	เลือก 1 ข้อ	ใช่	ไม่ใช่	ไม่ต้องการตอบ
27	คุณมีอาการแพ้กลูเตน (Gluten) หรือไม่?	เลือก 1 ข้อ	ใช่	ไม่ใช่	ไม่ต้องการตอบ
28	มีสิ่งอื่นที่นอกจากอาหารที่ทำให้คุณเกิดอาการภูมิแพ้?	เลือกอย่างน้อย 1 ข้อ	สัตว์เลี้ยง	สัตว์ป่า	ไม้เลื้อย	ดอกไม้	แสงแดด
29	คุณมีอาการแพ้ตามฤดูกาลหรือไม่?	เลือก 1 ข้อ	ใช่	ไม่ใช่	ไม่ต้องการตอบ
30	คุณเคยเข้ารับการตรวจเหล่านี้หรือไม่?	เลือกอย่างน้อย 1 ข้อ	เบาหวาน	ความดัน	ทางเดินอาหารอักเสบ	ไมเกรน	ไม่ต้องการตอบ
31	คุณทำอาหารเองและทานอาหารที่ทำเองบ่อยเพียงใด?	เลือก 1 ข้อ	ไม่เคย	น้อยครั้ง (ไม่กี่ครั้งต่อเดือน)	บางครั้ง (1-2 ครั้งต่อสัปดาห์)	สม่ำเสมอ (3-5 ครั้งต่อสัปดาห์)	เป็นประจำทุกวัน	ไม่ต้องการตอบ
32	คุณทานอาหารสำเร็จรูปบ่อยเพียงใด?	เลือก 1 ข้อ	ไม่เคย	น้อยครั้ง (ไม่กี่ครั้งต่อเดือน)	บางครั้ง (1-2 ครั้งต่อสัปดาห์)	สม่ำเสมอ (3-5 ครั้งต่อสัปดาห์)	เป็นประจำทุกวัน	ไม่ต้องการตอบ
33	คุณทานเนื้อสัตว์/ไข่บ่อยเพียงใด?	เลือก 1 ข้อ	ไม่เคย	น้อยครั้ง (ไม่กี่ครั้งต่อเดือน)	บางครั้ง (1-2 ครั้งต่อสัปดาห์)	สม่ำเสมอ (3-5 ครั้งต่อสัปดาห์)	เป็นประจำทุกวัน	ไม่ต้องการตอบ
34	คุณทานธัญพืชอย่างน้อย 2 ครั้งต่อวันบ่อยเพียงใด?	เลือก 1 ข้อ	ไม่เคย	น้อยครั้ง (ไม่กี่ครั้งต่อเดือน)	บางครั้ง (1-2 ครั้งต่อสัปดาห์)	สม่ำเสมอ (3-5 ครั้งต่อสัปดาห์)	เป็นประจำทุกวัน	ไม่ต้องการตอบ
35	คุณทานผัก/ผลไม้อย่างน้อย 2 -3 ครั้งต่อวันบ่อยเพียงใด?	เลือก 1 ข้อ	ไม่เคย	น้อยครั้ง (ไม่กี่ครั้งต่อเดือน)	บางครั้ง (1-2 ครั้งต่อสัปดาห์)	สม่ำเสมอ (3-5 ครั้งต่อสัปดาห์)	เป็นประจำทุกวัน	ไม่ต้องการตอบ
36	คุณทานอาหารที่มีส่วนผสมของนมหรือชีสอย่างน้อย 2 ครั้งต่อวันบ่อยเพียงใด?	เลือก 1 ข้อ	ไม่เคย	น้อยครั้ง (ไม่กี่ครั้งต่อเดือน)	บางครั้ง (1-2 ครั้งต่อสัปดาห์)	สม่ำเสมอ (3-5 ครั้งต่อสัปดาห์)	เป็นประจำทุกวัน	ไม่ต้องการตอบ
37	คุณทานอาหารที่มีส่วนผสมของสารทดแทนนมบ่อยเพียงใด?	เลือก 1 ข้อ	ไม่เคย	น้อยครั้ง (ไม่กี่ครั้งต่อเดือน)	บางครั้ง (1-2 ครั้งต่อสัปดาห์)	สม่ำเสมอ (3-5 ครั้งต่อสัปดาห์)	เป็นประจำทุกวัน	ไม่ต้องการตอบ
38	คุณทานของหวานบ่อยเพียงใด?	เลือก 1 ข้อ	ไม่เคย	น้อยครั้ง (ไม่กี่ครั้งต่อเดือน)	บางครั้ง (1-2 ครั้งต่อสัปดาห์)	สม่ำเสมอ (3-5 ครั้งต่อสัปดาห์)	เป็นประจำทุกวัน	ไม่ต้องการตอบ
39	คุณทานเนื้อแดงบ่อยเพียงใด?	เลือก 1 ข้อ	ไม่เคย	น้อยครั้ง (ไม่กี่ครั้งต่อเดือน)	บางครั้ง (1-2 ครั้งต่อสัปดาห์)	สม่ำเสมอ (3-5 ครั้งต่อสัปดาห์)	เป็นประจำทุกวัน	ไม่ต้องการตอบ
40	คุณทานเนื้อสัตว์ปีกบ่อยเพียงใด?	เลือก 1 ข้อ	ไม่เคย	น้อยครั้ง (ไม่กี่ครั้งต่อเดือน)	บางครั้ง (1-2 ครั้งต่อสัปดาห์)	สม่ำเสมอ (3-5 ครั้งต่อสัปดาห์)	เป็นประจำทุกวัน	ไม่ต้องการตอบ
41	คุณทานอาหารทะเลบ่อยเพียงใด?	เลือก 1 ข้อ	ไม่เคย	น้อยครั้ง (ไม่กี่ครั้งต่อเดือน)	บางครั้ง (1-2 ครั้งต่อสัปดาห์)	สม่ำเสมอ (3-5 ครั้งต่อสัปดาห์)	เป็นประจำทุกวัน	ไม่ต้องการตอบ
42	คุณทางขนมที่มีส่วนผสมของเกลือบ่อยเพียงใด?	เลือก 1 ข้อ	ไม่เคย	น้อยครั้ง (ไม่กี่ครั้งต่อเดือน)	บางครั้ง (1-2 ครั้งต่อสัปดาห์)	สม่ำเสมอ (3-5 ครั้งต่อสัปดาห์)	เป็นประจำทุกวัน	ไม่ต้องการตอบ
43	คุณทานของหวานที่มีน้ำตาลสูงบ่อยเพียงใด?	เลือก 1 ข้อ	ไม่เคย	น้อยครั้ง (ไม่กี่ครั้งต่อเดือน)	บางครั้ง (1-2 ครั้งต่อสัปดาห์)	สม่ำเสมอ (3-5 ครั้งต่อสัปดาห์)	เป็นประจำทุกวัน	ไม่ต้องการตอบ
44	คุณทานไข่ไก่ทั้งลูกหรือไม่?	เลือก 1 ข้อ	ใช่	ไม่ใช	ไม่ต้องการตอบ
45	คุณดื่มเครื่องดื่มที่มีน้ำตาลเป็นส่วนผสม ตัวอย่างเช่นเครื่องดื่มโซดาและน้ำผลไม้ (ไม่รวมน้ำผลไม้แท้)	เลือก 1 ข้อ	ไม่เคย	น้อยครั้ง (ไม่กี่ครั้งต่อเดือน)	บางครั้ง (1-2 ครั้งต่อสัปดาห์)	สม่ำเสมอ (3-5 ครั้งต่อสัปดาห์)	เป็นประจำทุกวัน	ไม่ต้องการตอบ
46	ทานเครื่องดื่มหรืออาหารที่มีความหวานจากน้ำตาลเทียมบ่อยเพียงใด?	เลือก 1 ข้อ	ไม่เคย	น้อยครั้ง (ไม่กี่ครั้งต่อเดือน)	บางครั้ง (1-2 ครั้งต่อสัปดาห์)	สม่ำเสมอ (3-5 ครั้งต่อสัปดาห์)	เป็นประจำทุกวัน	ไม่ต้องการตอบ
47	ทานน้ำอย่างน้อย 1 ลิตรต่อวันบ่อยเพียงใด?');	เลือก 1 ข้อ	ไม่เคย	น้อยครั้ง (ไม่กี่ครั้งต่อเดือน)	บางครั้ง (1-2 ครั้งต่อสัปดาห์)	สม่ำเสมอ (3-5 ครั้งต่อสัปดาห์)	เป็นประจำทุกวัน	ไม่ต้องการตอบ

## Sheet: S9C - Response
ID	age	gender	height	weight	Q1	Q2	Q3	Q4	Q5	Q6	Q7	Q8	Q9	Q10	Q11	Q12	Q13	Q14	Q15	Q16	Q17	Q18	Q19	Q20	Q21	Q22	Q23	Q24	Q25	Q26	Q27	Q28	Q29	Q30	Q31	Q32	Q33	Q34	Q35	Q36	Q37	Q38	Q39	Q40	Q41	Q42	Q43	Q44	Q45
MG001
MG002	28	M	160	71	vegetable and animal meat	yes	rarely (a few times per month)	bottled water	none of these choices	everyday	both	never	rarely (a few times per month)	beer/cider	everyday	rarely (a few times per month)	6-7 hours	once a day					no	change 2-5 kg	no	no	no	yes		no	no		no		rarely (a few times per month)	everyday	usually (3-5 times per week)	rarely (a few times per month)	usually (3-5 times per week)	never	usually (3-5 times per week)		never	sometimes (1-2 times per week)	rarely (a few times per month)	sometimes (1-2 times per week)	rarely (a few times per month)	whole	rarely (a few times per month)
MG004	39	F	157	53	vegetable and animal meat	no	sometimes (1-2 times per week)	bottled water	raw meat	sometimes (1-2 times per week)	both	never	never		everyday	rarely (a few times per month)	5-6 hours	less than one time per day	normal	within 1 last month		never	no	change 2-5 kg	no	yes	no	no	both	no	no		no		rarely (a few times per month)	sometimes (1-2 times per week)	sometimes (1-2 times per week)	rarely (a few times per month)	sometimes (1-2 times per week)	everyday	rarely (a few times per month)	usually (3-5 times per week)	usually (3-5 times per week)	usually (3-5 times per week)	usually (3-5 times per week)	rarely (a few times per month)	rarely (a few times per month)	whole	rarely (a few times per month)
MG009	23	F	160	48	vegetable and animal meat	yes	sometimes (1-2 times per week)	bottled water	raw meat | low-carb foods	sometimes (1-2 times per week)	indoor	never	rarely (a few times per month)	beer/cider | liquor	everyday		5-6 hours	once a day	quite hard			never	no	change 2-5 kg	no	no	no		both	no	no	wild animal	no		usually (3-5 times per week)	sometimes (1-2 times per week)	everyday	rarely (a few times per month)	sometimes (1-2 times per week)	usually (3-5 times per week)	sometimes (1-2 times per week)	usually (3-5 times per week)	usually (3-5 times per week)	sometimes (1-2 times per week)	sometimes (1-2 times per week)	usually (3-5 times per week)	usually (3-5 times per week)	whole	never
MG013	19	F	154	42	vegetable and animal meat	yes	usually (3-5 times per week)	bottled water	none of these choices	sometimes (1-2 times per week)	indoor	never	rarely (a few times per month)	beer/cider	everyday	rarely (a few times per month)	6-7 hours	twice a day	normal	more than 1 year/never		never	no	change not more than 2 kg	no	no	no	yes		no	no	wild animal | ivy	no	diabetes	rarely (a few times per month)	sometimes (1-2 times per week)	everyday	sometimes (1-2 times per week)	usually (3-5 times per week)		everyday	sometimes (1-2 times per week)	sometimes (1-2 times per week)	usually (3-5 times per week)	rarely (a few times per month)	sometimes (1-2 times per week)	rarely (a few times per month)	whole	never
MG014	25	M	165	60	vegetable and animal meat	yes	usually (3-5 times per week)	bottled water	halal	rarely (a few times per month)	both	never	never		everyday		5-6 hours		normal			never	no	change not more than 2 kg	no	no	no			no	no	ivy	no		usually (3-5 times per week)	sometimes (1-2 times per week)	usually (3-5 times per week)	never	sometimes (1-2 times per week)	sometimes (1-2 times per week)	everyday	sometimes (1-2 times per week)	rarely (a few times per month)	everyday	rarely (a few times per month)	rarely (a few times per month)	sometimes (1-2 times per week)	whole	never
MG023	38	F	162	60	vegetable and animal meat but not consume raw meat	yes	rarely (a few times per month)	tap water	none of these choices	never	Never	never	sometimes (1-2 times per week)	beer/cider	everyday	rarely (a few times per month)	6-7 hours	once a day	normal	2-6 months ago		never	no	change 2-5 kg	no	no	no	yes		no	no	wild animal	yes	diabetes | hypertension	rarely (a few times per month)	usually (3-5 times per week)	everyday	rarely (a few times per month)	sometimes (1-2 times per week)	rarely (a few times per month)	rarely (a few times per month)	usually (3-5 times per week)	usually (3-5 times per week)	usually (3-5 times per week)	sometimes (1-2 times per week)	everyday	sometimes (1-2 times per week)	whole	never
MG027	29	M	169	63	vegetable and animal meat	yes	rarely (a few times per month)	bottled water	none of these choices	never	indoor	never	never		everyday	never	6-7 hours	once a day	normal			never	no	change not more than 2 kg	no	no	no	no	both	no	no		no		never	rarely (a few times per month)	usually (3-5 times per week)	never	everyday	sometimes (1-2 times per week)	sometimes (1-2 times per week)	sometimes (1-2 times per week)	never	usually (3-5 times per week)	usually (3-5 times per week)	usually (3-5 times per week)	rarely (a few times per month)	whole	never
MG041	38	F	167	54	vegetable and animal meat	yes	rarely (a few times per month)	tap water	none of these choices	usually (3-5 times per week)	both	never	never		everyday	everyday	7-8 hours	less than one time per day	quite liquid	7 months - 1 year ago		used or using (pills)	no	change not more than 2 kg	no	no	no	yes	both	no	no		no		rarely (a few times per month)	everyday	everyday	sometimes (1-2 times per week)	sometimes (1-2 times per week)	usually (3-5 times per week)	rarely (a few times per month)	sometimes (1-2 times per week)	rarely (a few times per month)	sometimes (1-2 times per week)	sometimes (1-2 times per week)	rarely (a few times per month)	rarely (a few times per month)	whole	never
MG043	41	F	153	49	vegetable and animal meat	yes	usually (3-5 times per week)	bottled water	raw meat	sometimes (1-2 times per week)	both	never	rarely (a few times per month)	red wine	everyday	sometimes (1-2 times per week)	5-6 hours	once a day	normal	more than 1 year/never	more than 1 year/never	never	no	change not more than 2 kg	no	no	no	yes	formulated milk	no	no		no	gastrointestinal inflammation	sometimes (1-2 times per week)	usually (3-5 times per week)	usually (3-5 times per week)	rarely (a few times per month)	usually (3-5 times per week)	sometimes (1-2 times per week)	rarely (a few times per month)	sometimes (1-2 times per week)	usually (3-5 times per week)	sometimes (1-2 times per week)	usually (3-5 times per week)	sometimes (1-2 times per week)	sometimes (1-2 times per week)	whole	never
MG046	29	F	160	73	vegetable and animal meat but not consume raw meat	yes	rarely (a few times per month)	bottled water	low-carb foods	rarely (a few times per month)	depend on season	never	rarely (a few times per month)	beer/cider | cocktail | others	everyday	rarely (a few times per month)	7-8 hours	once a day	normal			never	no	change more than 5 kg	no	no	no	yes		no	no		no		rarely (a few times per month)	usually (3-5 times per week)	usually (3-5 times per week)	rarely (a few times per month)	sometimes (1-2 times per week)	sometimes (1-2 times per week)	sometimes (1-2 times per week)	sometimes (1-2 times per week)	rarely (a few times per month)	sometimes (1-2 times per week)	sometimes (1-2 times per week)	rarely (a few times per month)	rarely (a few times per month)	partial	rarely (a few times per month)
MG055
MG061	41	F	160	60	vegetable and animal meat	yes	sometimes (1-2 times per week)	bottled water	none of these choices	sometimes (1-2 times per week)	indoor	never	never		everyday	never	5-6 hours	three times a day	normal	7 months - 1 year ago		never	no	change 2-5 kg	no	no	no	yes		no	no	ivy | sunlight	yes		sometimes (1-2 times per week)	usually (3-5 times per week)	usually (3-5 times per week)	usually (3-5 times per week)	usually (3-5 times per week)	sometimes (1-2 times per week)	rarely (a few times per month)	sometimes (1-2 times per week)	sometimes (1-2 times per week)	sometimes (1-2 times per week)	rarely (a few times per month)	rarely (a few times per month)	rarely (a few times per month)	whole	rarely (a few times per month)
MG063	29	M	180	73	vegetable and animal meat	yes	usually (3-5 times per week)	bottled water	halal	usually (3-5 times per week)	both	never	never		everyday	rarely (a few times per month)	5-6 hours	once a day	normal			never	no	change not more than 2 kg	no	no	no	yes	formulated milk	no	no		no		sometimes (1-2 times per week)	usually (3-5 times per week)	usually (3-5 times per week)	sometimes (1-2 times per week)	rarely (a few times per month)	rarely (a few times per month)	never	rarely (a few times per month)	rarely (a few times per month)	sometimes (1-2 times per week)	sometimes (1-2 times per week)	rarely (a few times per month)	rarely (a few times per month)	whole	never
MG065	52	M	165	62	vegetable and animal meat	yes	sometimes (1-2 times per week)	tap water	none of these choices	never	Never	never	never		everyday	never	5-6 hours	twice a day	normal			never	no	change not more than 2 kg	no	no		yes		no	no		no		everyday	sometimes (1-2 times per week)	everyday	sometimes (1-2 times per week)	everyday	rarely (a few times per month)	sometimes (1-2 times per week)	sometimes (1-2 times per week)	rarely (a few times per month)	never	rarely (a few times per month)	rarely (a few times per month)	rarely (a few times per month)	whole	rarely (a few times per month)
MG066	40	F	161	51	vegetable and animal meat but not consume raw meat	yes	rarely (a few times per month)	bottled water	low-carb foods	rarely (a few times per month)	indoor	never	never		everyday	usually (3-5 times per week)	6-7 hours	once a day	normal	2-6 months ago		never	no	change 2-5 kg	yes	no	no	yes		no	no	ivy	no		rarely (a few times per month)	usually (3-5 times per week)	everyday	never	never	rarely (a few times per month)	rarely (a few times per month)	sometimes (1-2 times per week)	everyday	everyday	rarely (a few times per month)	usually (3-5 times per week)	rarely (a few times per month)	whole	never
MG072	31	F	154	48	vegetable and animal meat but not consume raw meat	yes	rarely (a few times per month)	bottled water	none of these choices	never	indoor	never	never		everyday	rarely (a few times per month)	6-7 hours	once a day		within 1 last month	2-6 months ago	never	no	change not more than 2 kg	no	yes	yes	yes	formulated milk	no	no		yes		rarely (a few times per month)	usually (3-5 times per week)	everyday	rarely (a few times per month)	sometimes (1-2 times per week)	rarely (a few times per month)	never	everyday	everyday	usually (3-5 times per week)	rarely (a few times per month)	usually (3-5 times per week)	sometimes (1-2 times per week)	whole	rarely (a few times per month)
MG081	69	F	168	95	vegetable and animal meat but not consume raw meat	yes	rarely (a few times per month)	bottled water	none of these choices	sometimes (1-2 times per week)	both	never	never		everyday	usually (3-5 times per week)	less than 5 hours	once a day		2-6 months ago	2-6 months ago	never	no	change 2-5 kg	yes	no	yes	yes		yes	no	wild animal | ivy	no		usually (3-5 times per week)	rarely (a few times per month)	everyday	rarely (a few times per month)	everyday	rarely (a few times per month)	rarely (a few times per month)	everyday	usually (3-5 times per week)	usually (3-5 times per week)	sometimes (1-2 times per week)	rarely (a few times per month)	rarely (a few times per month)	whole	never
MG084	36	M	167	49	vegetable and animal meat	no	rarely (a few times per month)	bottled water	none of these choices	rarely (a few times per month)	outdoor	never	rarely (a few times per month)	beer/cider	everyday	everyday	5-6 hours	once a day	normal	more than 1 year/never		never	no	change not more than 2 kg	no	no	no	no	both	no	no		no		rarely (a few times per month)	everyday	everyday	sometimes (1-2 times per week)	sometimes (1-2 times per week)	usually (3-5 times per week)	rarely (a few times per month)	sometimes (1-2 times per week)	rarely (a few times per month)	sometimes (1-2 times per week)	rarely (a few times per month)	rarely (a few times per month)	rarely (a few times per month)	whole	never
MG086	42	M	169	66	vegetable and animal meat	yes	rarely (a few times per month)	bottled water	raw meat | halal	rarely (a few times per month)	indoor	never	never		everyday	never	5-6 hours	less than one time per day	normal			never	no	change not more than 2 kg	no	yes					no		no		rarely (a few times per month)	rarely (a few times per month)	usually (3-5 times per week)		rarely (a few times per month)	never	sometimes (1-2 times per week)	usually (3-5 times per week)	sometimes (1-2 times per week)	usually (3-5 times per week)	rarely (a few times per month)	sometimes (1-2 times per week)	rarely (a few times per month)	whole	rarely (a few times per month)
MG089	33	M	160	68	vegetable and animal meat	yes	rarely (a few times per month)		raw meat	rarely (a few times per month)	outdoor	never	rarely (a few times per month)	beer/cider	everyday	rarely (a few times per month)	5-6 hours	once a day	quite hard	more than 1 year/never	more than 1 year/never	never	no	change not more than 2 kg	no	no	no	yes		no	no	ivy	no		sometimes (1-2 times per week)	rarely (a few times per month)	sometimes (1-2 times per week)	rarely (a few times per month)	rarely (a few times per month)	sometimes (1-2 times per week)	everyday	everyday	usually (3-5 times per week)	sometimes (1-2 times per week)	rarely (a few times per month)	sometimes (1-2 times per week)	sometimes (1-2 times per week)	whole	rarely (a few times per month)
MG094	28	F	158	57	vegetable and animal meat but not consume raw meat	yes	sometimes (1-2 times per week)	bottled water	low-carb foods	never	Never	never	sometimes (1-2 times per week)	beer/cider	everyday	never	5-6 hours	once a day	normal			never	no	change not more than 2 kg	no	no	yes	yes		no	no	ivy	no		usually (3-5 times per week)	sometimes (1-2 times per week)	everyday	rarely (a few times per month)	everyday	sometimes (1-2 times per week)	rarely (a few times per month)	rarely (a few times per month)	usually (3-5 times per week)	sometimes (1-2 times per week)	usually (3-5 times per week)	rarely (a few times per month)	rarely (a few times per month)		never
MG104	22	F	165	54	vegetable and animal meat	yes	usually (3-5 times per week)	bottled water	raw meat | low-carb foods	sometimes (1-2 times per week)	indoor	never	rarely (a few times per month)	liquor	everyday	rarely (a few times per month)	less than 5 hours	once a day				never	no	change not more than 2 kg	no	no	no	yes		no	no		no		sometimes (1-2 times per week)	rarely (a few times per month)	everyday	rarely (a few times per month)	usually (3-5 times per week)	sometimes (1-2 times per week)	sometimes (1-2 times per week)	usually (3-5 times per week)	rarely (a few times per month)	sometimes (1-2 times per week)	rarely (a few times per month)	sometimes (1-2 times per week)	usually (3-5 times per week)	whole	never
MG121
MG122	26	F	151	59	vegetable and animal meat	yes	sometimes (1-2 times per week)	bottled water	none of these choices	usually (3-5 times per week)	both	never	rarely (a few times per month)	beer/cider | others	everyday	sometimes (1-2 times per week)	6-7 hours	twice a day	normal			never	no	change more than 5 kg	no	no	no			no	no		no	hypertension	rarely (a few times per month)	usually (3-5 times per week)	usually (3-5 times per week)	sometimes (1-2 times per week)	sometimes (1-2 times per week)	rarely (a few times per month)	sometimes (1-2 times per week)	sometimes (1-2 times per week)	sometimes (1-2 times per week)	sometimes (1-2 times per week)	sometimes (1-2 times per week)	rarely (a few times per month)	rarely (a few times per month)	whole	rarely (a few times per month)
MG127	53	F	155	56	vegetable and animal meat	no	rarely (a few times per month)	bottled water	raw meat | low-carb foods | halal	rarely (a few times per month)	indoor	never	never		everyday	never	5-6 hours	four times a day		2-6 months ago		never	no	change 2-5 kg	no	no	yes	yes	breast milk	no	no		no		everyday	everyday	everyday	rarely (a few times per month)	sometimes (1-2 times per week)	rarely (a few times per month)	rarely (a few times per month)	usually (3-5 times per week)	everyday	usually (3-5 times per week)		sometimes (1-2 times per week)	usually (3-5 times per week)	whole	never
MG128	25	M	170	70	vegetable and animal meat	yes	rarely (a few times per month)	bottled water	low-carb foods	sometimes (1-2 times per week)	indoor	never	rarely (a few times per month)	beer/cider	everyday	never	6-7 hours	once a day	normal	more than 1 year/never		never	no	change more than 5 kg	no	no	yes	yes	both	no	no		no		sometimes (1-2 times per week)	rarely (a few times per month)	everyday	sometimes (1-2 times per week)	sometimes (1-2 times per week)	everyday	never	sometimes (1-2 times per week)	everyday	everyday	sometimes (1-2 times per week)	sometimes (1-2 times per week)	sometimes (1-2 times per week)	whole	never
MG131	37	M	168	65	vegetable and animal meat	no	rarely (a few times per month)	bottled water	raw meat	usually (3-5 times per week)	indoor			0	everyday	never	5-6 hours	less than one time per day	normal		7 months - 1 year ago	never	no	change not more than 2 kg	no	no	no	yes	formulated milk	no		wild animal	no		rarely (a few times per month)	rarely (a few times per month)	everyday	everyday	usually (3-5 times per week)	usually (3-5 times per week)	sometimes (1-2 times per week)	sometimes (1-2 times per week)	rarely (a few times per month)	sometimes (1-2 times per week)	rarely (a few times per month)	rarely (a few times per month)		whole	never
MG137	28	F	161	59	vegetable and animal meat	yes	usually (3-5 times per week)	bottled water	raw meat | halal	rarely (a few times per month)	indoor	rarely (a few times per month)	rarely (a few times per month)	beer/cider	everyday	never	5-6 hours	once a day	quite hard	2-6 months ago	more than 1 year/never	never	no	change 2-5 kg	no	no	no	yes		no	no	wild animal | ivy |	yes	migraine	sometimes (1-2 times per week)	everyday	everyday	rarely (a few times per month)	sometimes (1-2 times per week)	sometimes (1-2 times per week)	sometimes (1-2 times per week)	everyday	usually (3-5 times per week)	usually (3-5 times per week)	sometimes (1-2 times per week)	sometimes (1-2 times per week)	sometimes (1-2 times per week)	whole	rarely (a few times per month)
MG140	22	M	167	60	vegetable and animal meat	no	rarely (a few times per month)	bottled water	raw meat	usually (3-5 times per week)	both	never	rarely (a few times per month)	others	everyday	rarely (a few times per month)	5-6 hours	three times a day	normal	more than 1 year/never		never	no	change not more than 2 kg	no	no	no	no	formulated milk	no	no		no		sometimes (1-2 times per week)	sometimes (1-2 times per week)	usually (3-5 times per week)	usually (3-5 times per week)	rarely (a few times per month)	everyday	rarely (a few times per month)	rarely (a few times per month)	rarely (a few times per month)	sometimes (1-2 times per week)	rarely (a few times per month)	rarely (a few times per month)	rarely (a few times per month)	whole	never
MG144	37	F	164	57	vegetable and animal meat but not consume raw meat	no	sometimes (1-2 times per week)		none of these choices	rarely (a few times per month)	both	never	never		everyday	never	7-8 hours	once a day	normal	2-6 months ago	more than 1 year/never	never	no	change not more than 2 kg	no	no	no	yes		no	no	wild animal	yes	migraine	never	everyday	sometimes (1-2 times per week)	rarely (a few times per month)	rarely (a few times per month)	sometimes (1-2 times per week)	never	usually (3-5 times per week)	sometimes (1-2 times per week)	usually (3-5 times per week)	rarely (a few times per month)	rarely (a few times per month)	rarely (a few times per month)	whole	rarely (a few times per month)
MG157	35	M	172	74	vegetable and animal meat	no	usually (3-5 times per week)	bottled water	raw meat | low-carb foods	usually (3-5 times per week)	indoor	never	rarely (a few times per month)	red wine	everyday	rarely (a few times per month)	7-8 hours	once a day	normal	within 1 last month	more than 1 year/never	never	no	change 2-5 kg	no	no	no	yes	both	no	no		no		rarely (a few times per month)	sometimes (1-2 times per week)	everyday	everyday	everyday	rarely (a few times per month)	rarely (a few times per month)	rarely (a few times per month)	sometimes (1-2 times per week)	sometimes (1-2 times per week)	sometimes (1-2 times per week)	sometimes (1-2 times per week)	rarely (a few times per month)	whole	never
MG005	28	M	157	54	vegetable and animal meat	yes	rarely (a few times per month)	bottled water		sometimes (1-2 times per week)	indoor	never	never		everyday	never	5-6 hours	three times a day	normal	2-6 months ago	2-6 months ago	never	no	change 2-5 kg	no	no	no	yes		no	no		no		everyday	rarely (a few times per month)	usually (3-5 times per week)	rarely (a few times per month)	everyday	everyday	rarely (a few times per month)	everyday	never	sometimes (1-2 times per week)	sometimes (1-2 times per week)	sometimes (1-2 times per week)	sometimes (1-2 times per week)	whole	rarely (a few times per month)
MG007	42	F	151	60	vegetable and animal meat but not consume raw meat	yes	usually (3-5 times per week)		none of these choices	never	Never	never	never		everyday	never	7-8 hours	twice a day	normal			never	no	change 2-5 kg	no	no	yes	yes	both				no		usually (3-5 times per week)	sometimes (1-2 times per week)	everyday	sometimes (1-2 times per week)	everyday	everyday	sometimes (1-2 times per week)	usually (3-5 times per week)	never	everyday	sometimes (1-2 times per week)	sometimes (1-2 times per week)	usually (3-5 times per week)	whole	sometimes (1-2 times per week)
MG008	26	F	155	53	vegetable and animal meat	no	sometimes (1-2 times per week)	bottled water	raw meat	rarely (a few times per month)	depend on season	never	rarely (a few times per month)	beer/cider	everyday	everyday	5-6 hours	once a day	quite hard			used or using (pills)	no	change more than 5 kg	no	no	no	yes		no	no		no	diabetes	sometimes (1-2 times per week)	usually (3-5 times per week)	everyday	rarely (a few times per month)	sometimes (1-2 times per week)	everyday	sometimes (1-2 times per week)	everyday	everyday	rarely (a few times per month)	usually (3-5 times per week)	rarely (a few times per month)	everyday	whole	never
MG010	36	F	170	73	vegetable and animal meat	yes	rarely (a few times per month)	bottled water	low-carb foods	sometimes (1-2 times per week)	outdoor	never	rarely (a few times per month)	beer/cider	everyday	never	7-8 hours	once a day	normal	2-6 months ago	more than 1 year/never	never	no	change 2-5 kg	no	no	no	yes		no	no	ivy | flower	yes		rarely (a few times per month)	usually (3-5 times per week)	everyday	rarely (a few times per month)											sometimes (1-2 times per week)
MG015	25	F	151	44	vegetable and animal meat but not consume raw meat		sometimes (1-2 times per week)	bottled water	none of these choices	sometimes (1-2 times per week)	indoor	never		beer/cider	everyday	never	7-8 hours	once a day				never	no	change 2-5 kg	no	no							no		rarely (a few times per month)	sometimes (1-2 times per week)	usually (3-5 times per week)	rarely (a few times per month)	usually (3-5 times per week)	sometimes (1-2 times per week)	rarely (a few times per month)	usually (3-5 times per week)	usually (3-5 times per week)	usually (3-5 times per week)	rarely (a few times per month)	sometimes (1-2 times per week)	sometimes (1-2 times per week)	whole	rarely (a few times per month)
MG017	29	F	158	55	vegetable and animal meat but not consume raw meat	yes	rarely (a few times per month)	bottled water	none of these choices	rarely (a few times per month)	indoor	never	never		everyday	rarely (a few times per month)	5-6 hours	once a day	normal	2-6 months ago		never	no	change more than 5 kg	no	no	no	no	formulated milk	no	no		no		rarely (a few times per month)	everyday	everyday		usually (3-5 times per week)	sometimes (1-2 times per week)	rarely (a few times per month)	sometimes (1-2 times per week)	usually (3-5 times per week)	usually (3-5 times per week)	usually (3-5 times per week)	rarely (a few times per month)	rarely (a few times per month)	whole	rarely (a few times per month)
MG018	40	M	176	70	vegetable and animal meat	no	usually (3-5 times per week)	bottled water	raw meat | low-carb foods	usually (3-5 times per week)	both	never	rarely (a few times per month)	beer/cider	everyday	never	7-8 hours	once a day		within 1 last month		never	no	change not more than 2 kg	no	no	no	yes	both	no	no		no		sometimes (1-2 times per week)	usually (3-5 times per week)	everyday	everyday	everyday	everyday		sometimes (1-2 times per week)	usually (3-5 times per week)	usually (3-5 times per week)	sometimes (1-2 times per week)	rarely (a few times per month)	sometimes (1-2 times per week)	whole	never
MG019	36	F	151	48	vegetable and animal meat	yes	rarely (a few times per month)	bottled water	none of these choices	usually (3-5 times per week)	both	never	rarely (a few times per month)	others	everyday	never	6-7 hours	once a day	normal	more than 1 year/never	more than 1 year/never	never	no	change 2-5 kg	no	no	no	no	both	no	no	flower	yes	hypertension | gastrointestinal inflammation	usually (3-5 times per week)	sometimes (1-2 times per week)	everyday	rarely (a few times per month)	usually (3-5 times per week)	sometimes (1-2 times per week)	sometimes (1-2 times per week)	everyday	sometimes (1-2 times per week)	sometimes (1-2 times per week)	rarely (a few times per month)	sometimes (1-2 times per week)	usually (3-5 times per week)	whole	never
MG025	42	M	180	86	vegetable and animal meat	yes	sometimes (1-2 times per week)		none of these choices	rarely (a few times per month)	outdoor	never	never		everyday	never	6-7 hours	once a day	normal		more than 1 year/never	never	no	change not more than 2 kg	no	no	no		both	no	no	flower		hypertension	sometimes (1-2 times per week)	usually (3-5 times per week)	everyday	never	everyday	everyday	sometimes (1-2 times per week)	everyday	usually (3-5 times per week)	usually (3-5 times per week)	sometimes (1-2 times per week)	usually (3-5 times per week)	sometimes (1-2 times per week)	whole	rarely (a few times per month)
MG028	26	F	159	44	vegetable and animal meat	yes	rarely (a few times per month)	bottled water	low-carb foods	never	indoor	never	never		everyday	everyday	5-6 hours	once a day	normal	2-6 months ago	more than 1 year/never	never	no	change 2-5 kg	no	no	no	yes		no	no	wild animal	yes	gastrointestinal inflammation	usually (3-5 times per week)	everyday	everyday	usually (3-5 times per week)	sometimes (1-2 times per week)	sometimes (1-2 times per week)	never	sometimes (1-2 times per week)	rarely (a few times per month)	usually (3-5 times per week)	sometimes (1-2 times per week)	sometimes (1-2 times per week)	sometimes (1-2 times per week)	whole	rarely (a few times per month)
MG030	26	F	154	47	vegetable and animal meat	yes	sometimes (1-2 times per week)	bottled water	raw meat	rarely (a few times per month)	indoor	never	never		everyday	rarely (a few times per month)	5-6 hours	less than one time per day	quite liquid	more than 1 year/never		never	no	change 2-5 kg	no	no	no	no	formulated milk	no	no	wild animal | flower |	yes		rarely (a few times per month)	usually (3-5 times per week)	usually (3-5 times per week)	usually (3-5 times per week)	sometimes (1-2 times per week)	usually (3-5 times per week)	never	everyday	sometimes (1-2 times per week)	usually (3-5 times per week)	rarely (a few times per month)	usually (3-5 times per week)	usually (3-5 times per week)	whole	never
MG034	19	F	168	67	vegetable and animal meat	yes	sometimes (1-2 times per week)	bottled water	low-carb foods	rarely (a few times per month)	both	never	rarely (a few times per month)	beer/cider | red wine	everyday	sometimes (1-2 times per week)	6-7 hours	once a day	normal	within 1 last month		never	no	change 2-5 kg	no	no	no	yes	both	no	no	ivy	yes		usually (3-5 times per week)	rarely (a few times per month)	everyday	rarely (a few times per month)	sometimes (1-2 times per week)	rarely (a few times per month)	sometimes (1-2 times per week)	rarely (a few times per month)	never	usually (3-5 times per week)	usually (3-5 times per week)	rarely (a few times per month)	rarely (a few times per month)	whole	never
MG037	46	F	162	46	vegetable and animal meat	no	usually (3-5 times per week)	bottled water	low-carb foods	usually (3-5 times per week)	both	never	never		everyday	rarely (a few times per month)	7-8 hours	twice a day	normal		7 months - 1 year ago	never	no	change not more than 2 kg	no	yes	no	yes		no	no		no		rarely (a few times per month)	everyday	usually (3-5 times per week)	sometimes (1-2 times per week)	usually (3-5 times per week)	usually (3-5 times per week)	rarely (a few times per month)	rarely (a few times per month)	sometimes (1-2 times per week)	rarely (a few times per month)	usually (3-5 times per week)		rarely (a few times per month)	whole	rarely (a few times per month)
MG038
MG039
MG042	40	F	150	73	vegetable and animal meat but not consume raw meat	yes	sometimes (1-2 times per week)	bottled water	none of these choices	rarely (a few times per month)	outdoor	never	never		everyday	everyday	6-7 hours	once a day	normal		2-6 months ago	never	no	change 2-5 kg	no	yes	no	yes		no	yes	wild animal | flower |	yes		rarely (a few times per month)	usually (3-5 times per week)	everyday	never	sometimes (1-2 times per week)	rarely (a few times per month)	never	sometimes (1-2 times per week)	rarely (a few times per month)	sometimes (1-2 times per week)	sometimes (1-2 times per week)	sometimes (1-2 times per week)	sometimes (1-2 times per week)	whole	rarely (a few times per month)
MG044	35	F	162	52	vegetable and animal meat	yes	sometimes (1-2 times per week)	bottled water	raw meat | low-carb foods | halal	sometimes (1-2 times per week)	indoor	never	rarely (a few times per month)	red wine | cocktail | liquor	everyday	rarely (a few times per month)	6-7 hours	once a day	normal	2-6 months ago	more than 1 year/never	never	no	change 2-5 kg	no	yes	no			no	no				sometimes (1-2 times per week)		everyday	everyday	usually (3-5 times per week)	sometimes (1-2 times per week)	sometimes (1-2 times per week)	sometimes (1-2 times per week)	sometimes (1-2 times per week)	usually (3-5 times per week)	sometimes (1-2 times per week)	rarely (a few times per month)	sometimes (1-2 times per week)	whole	never
MG049
MG050	25	F	160	75	vegetable and animal meat but not consume raw meat	yes	rarely (a few times per month)	bottled water	none of these choices	sometimes (1-2 times per week)	both	never	never		everyday	rarely (a few times per month)	6-7 hours	once a day	normal			never	no	change not more than 2 kg	no	no	no	yes		no	no				sometimes (1-2 times per week)	usually (3-5 times per week)	usually (3-5 times per week)	rarely (a few times per month)	rarely (a few times per month)	rarely (a few times per month)	rarely (a few times per month)	rarely (a few times per month)	sometimes (1-2 times per week)	sometimes (1-2 times per week)	rarely (a few times per month)	rarely (a few times per month)	sometimes (1-2 times per week)	whole	never
MG051	25	F	164	69	vegetable and animal meat	no	usually (3-5 times per week)	bottled water	raw meat | low-carb foods	usually (3-5 times per week)	both	never	rarely (a few times per month)	beer/cider | liquor	everyday	rarely (a few times per month)	6-7 hours	once a day	quite hard	2-6 months ago	7 months - 1 year ago	never	no	change more than 5 kg	no	no	no	yes		no	no	wild animal	no		usually (3-5 times per week)	rarely (a few times per month)	usually (3-5 times per week)	sometimes (1-2 times per week)	usually (3-5 times per week)	usually (3-5 times per week)	sometimes (1-2 times per week)	sometimes (1-2 times per week)	usually (3-5 times per week)	usually (3-5 times per week)	rarely (a few times per month)	rarely (a few times per month)	sometimes (1-2 times per week)	whole	rarely (a few times per month)
MG052	38	M	170	89	vegetable and animal meat	yes	rarely (a few times per month)	tap water	none of these choices	rarely (a few times per month)	indoor	never	never		everyday	sometimes (1-2 times per week)	5-6 hours	once a day	normal			never	no	change not more than 2 kg	no	no	no	yes	both	no	no		no		sometimes (1-2 times per week)	usually (3-5 times per week)	everyday	usually (3-5 times per week)	usually (3-5 times per week)	sometimes (1-2 times per week)	rarely (a few times per month)	rarely (a few times per month)	everyday	sometimes (1-2 times per week)	sometimes (1-2 times per week)	sometimes (1-2 times per week)	rarely (a few times per month)	whole	never
MG053	60	F	145	47	vegetable and animal meat but not consume raw meat	yes	rarely (a few times per month)	tap water	none of these choices	rarely (a few times per month)	indoor	never	never		everyday	never	6-7 hours	once a day	normal		more than 1 year/never	never	no	change not more than 2 kg	no	no	no	yes		no	no	ivy	no		never	everyday	usually (3-5 times per week)	rarely (a few times per month)	rarely (a few times per month)	everyday	rarely (a few times per month)	sometimes (1-2 times per week)	never	rarely (a few times per month)	sometimes (1-2 times per week)	sometimes (1-2 times per week)	sometimes (1-2 times per week)	partial	never
MG056	39	F	152	45	vegetable and animal meat	no	sometimes (1-2 times per week)	bottled water	none of these choices	usually (3-5 times per week)	both	never	rarely (a few times per month)	beer/cider	everyday	sometimes (1-2 times per week)	7-8 hours	once a day	normal			never	no	change not more than 2 kg	no	no	no	yes		no	no		no		everyday	rarely (a few times per month)	usually (3-5 times per week)	usually (3-5 times per week)	everyday	usually (3-5 times per week)	sometimes (1-2 times per week)	sometimes (1-2 times per week)	sometimes (1-2 times per week)	sometimes (1-2 times per week)	sometimes (1-2 times per week)	rarely (a few times per month)	rarely (a few times per month)	whole	never
MG057	31	F	166	49	vegetable and animal meat	yes	rarely (a few times per month)	bottled water	none of these choices	usually (3-5 times per week)	outdoor	never	rarely (a few times per month)	beer/cider | red wine	everyday	everyday	6-7 hours		normal			never	no	change 2-5 kg	no	no	no	yes		no	no		yes		usually (3-5 times per week)	rarely (a few times per month)	everyday	rarely (a few times per month)	everyday	everyday	rarely (a few times per month)	usually (3-5 times per week)	sometimes (1-2 times per week)	sometimes (1-2 times per week)	rarely (a few times per month)	rarely (a few times per month)	rarely (a few times per month)	whole	never
MG058	26	F	158	50	vegetable and animal meat but not consume raw meat	yes	rarely (a few times per month)	tap water	none of these choices	sometimes (1-2 times per week)	outdoor	never	never		everyday	never	7-8 hours	once a day	normal	7 months - 1 year ago			no	change not more than 2 kg	no	yes	no	yes		no	no		no		sometimes (1-2 times per week)	rarely (a few times per month)	everyday	sometimes (1-2 times per week)	sometimes (1-2 times per week)	everyday	never	rarely (a few times per month)	usually (3-5 times per week)	sometimes (1-2 times per week)	rarely (a few times per month)	rarely (a few times per month)	rarely (a few times per month)	whole	never
MG060	24	M	171	61	vegetable and animal meat	no	rarely (a few times per month)	tap water	low-carb foods	sometimes (1-2 times per week)	both	never	never		everyday	everyday	6-7 hours	twice a day	normal			never	no	change more than 5 kg	no	no	no	no	breast milk	yes	no		yes	diabetes | hypertension	sometimes (1-2 times per week)	rarely (a few times per month)	everyday	usually (3-5 times per week)	sometimes (1-2 times per week)	sometimes (1-2 times per week)	never	sometimes (1-2 times per week)	everyday	usually (3-5 times per week)	sometimes (1-2 times per week)	rarely (a few times per month)	sometimes (1-2 times per week)	whole	never
MG064	43	F	166	54	vegetable and animal meat but not consume raw meat		sometimes (1-2 times per week)	bottled water	none of these choices	sometimes (1-2 times per week)	both	never	rarely (a few times per month)	beer/cider	everyday	rarely (a few times per month)	6-7 hours	once a day	normal	7 months - 1 year ago	more than 1 year/never	never	no	change not more than 2 kg	no	no	no			no	no	flower |	yes		rarely (a few times per month)	usually (3-5 times per week)	everyday	sometimes (1-2 times per week)	usually (3-5 times per week)	usually (3-5 times per week)	sometimes (1-2 times per week)	everyday	everyday	usually (3-5 times per week)	usually (3-5 times per week)	sometimes (1-2 times per week)	sometimes (1-2 times per week)	whole	never
MG071	39	M	167	88	vegetable and animal meat	no	everyday	bottled water	low-carb foods	usually (3-5 times per week)	outdoor	never	rarely (a few times per month)	beer/cider	everyday	everyday	6-7 hours	twice a day	normal		2-6 months ago	never	yes	change 2-5 kg	no	yes	yes	yes		no	no		yes	diabetes	sometimes (1-2 times per week)	usually (3-5 times per week)	everyday	usually (3-5 times per week)	usually (3-5 times per week)	everyday	rarely (a few times per month)	sometimes (1-2 times per week)	usually (3-5 times per week)	sometimes (1-2 times per week)	usually (3-5 times per week)	sometimes (1-2 times per week)	rarely (a few times per month)	whole	never
MG073	45	F	157	69	vegetable and animal meat but not consume raw meat	yes	never	bottled water	none of these choices	rarely (a few times per month)	indoor	never	usually (3-5 times per week)	beer/cider	everyday	never	6-7 hours	less than one time per day	normal			never	no	change not more than 2 kg	no	no	no	yes	both	no	no		no		never	everyday	everyday	never	sometimes (1-2 times per week)	never	never	sometimes (1-2 times per week)	never	usually (3-5 times per week)	never	sometimes (1-2 times per week)	rarely (a few times per month)	whole	never
MG075	40	M	173	70	vegetable and animal meat but not consume raw meat	yes	rarely (a few times per month)	bottled water	low-carb foods	rarely (a few times per month)	both	never	rarely (a few times per month)	beer/cider	everyday	sometimes (1-2 times per week)	7-8 hours	twice a day	normal	2-6 months ago	7 months - 1 year ago	used or using (pills)	no	change not more than 2 kg	no	no	yes	no	both	yes	no	sunlight	no		rarely (a few times per month)	everyday	everyday	rarely (a few times per month)	usually (3-5 times per week)	rarely (a few times per month)	rarely (a few times per month)	usually (3-5 times per week)	sometimes (1-2 times per week)	usually (3-5 times per week)		sometimes (1-2 times per week)	sometimes (1-2 times per week)	whole	rarely (a few times per month)
MG076	26	F	168	50	vegetable and animal meat	yes	rarely (a few times per month)	bottled water	none of these choices	never	indoor	never	rarely (a few times per month)	beer/cider	everyday	rarely (a few times per month)	5-6 hours	less than one time per day	normal	2-6 months ago		never	no	change more than 5 kg	no	no	no	yes		no	no		no		rarely (a few times per month)	everyday	everyday	rarely (a few times per month)	usually (3-5 times per week)	rarely (a few times per month)	never	usually (3-5 times per week)	sometimes (1-2 times per week)	usually (3-5 times per week)	sometimes (1-2 times per week)	sometimes (1-2 times per week)	everyday	partial	rarely (a few times per month)
MG079	41	F	162	55	vegetable and animal meat but not consume raw meat	no	sometimes (1-2 times per week)	bottled water	none of these choices	sometimes (1-2 times per week)	both	never	never		everyday	rarely (a few times per month)	5-6 hours	once a day	normal	more than 1 year/never	more than 1 year/never	never	no	change not more than 2 kg	no	no	no		both			ivy | flower	yes		rarely (a few times per month)	usually (3-5 times per week)	usually (3-5 times per week)	rarely (a few times per month)	sometimes (1-2 times per week)	never	never	rarely (a few times per month)	usually (3-5 times per week)	usually (3-5 times per week)	usually (3-5 times per week)	sometimes (1-2 times per week)	sometimes (1-2 times per week)	whole	never
MG083	27	F	157	44	vegetable and animal meat	yes	rarely (a few times per month)	bottled water	raw meat	rarely (a few times per month)	outdoor	never	rarely (a few times per month)	beer/cider	everyday	never	6-7 hours	less than one time per day	quite liquid	2-6 months ago		never	no	change 2-5 kg	no	no	no	no		no	no	sunlight	no	hypertension	never	usually (3-5 times per week)	everyday	rarely (a few times per month)	rarely (a few times per month)	usually (3-5 times per week)	rarely (a few times per month)	usually (3-5 times per week)	everyday	usually (3-5 times per week)	rarely (a few times per month)	rarely (a few times per month)	sometimes (1-2 times per week)	whole	never
MG085	32	M	162	51	vegetable and animal meat	yes	rarely (a few times per month)	bottled water	none of these choices	never	Never	never	rarely (a few times per month)	beer/cider | liquor	everyday	rarely (a few times per month)	6-7 hours	less than one time per day	normal	2-6 months ago		never	no	change not more than 2 kg	no	no	yes	no		yes	no		no	hypertension	everyday	rarely (a few times per month)	everyday	rarely (a few times per month)	sometimes (1-2 times per week)	rarely (a few times per month)	usually (3-5 times per week)	usually (3-5 times per week)	usually (3-5 times per week)	usually (3-5 times per week)	rarely (a few times per month)	sometimes (1-2 times per week)	sometimes (1-2 times per week)	whole	never
MG090	42	F	153	55	vegetable and animal meat	yes	sometimes (1-2 times per week)	bottled water	none of these choices	never		never	never		everyday	never	7-8 hours	once a day	normal			never	no	change not more than 2 kg	no	no	no	yes					no		rarely (a few times per month)	sometimes (1-2 times per week)	usually (3-5 times per week)	rarely (a few times per month)	rarely (a few times per month)	sometimes (1-2 times per week)	sometimes (1-2 times per week)	sometimes (1-2 times per week)	sometimes (1-2 times per week)	sometimes (1-2 times per week)	sometimes (1-2 times per week)	sometimes (1-2 times per week)	sometimes (1-2 times per week)	whole	never
MG091	27	F	160	68	vegetable and animal meat	yes	everyday	bottled water	none of these choices	rarely (a few times per month)	indoor	never	never		everyday	never	7-8 hours	twice a day	normal	within 1 last week		never	no	change not more than 2 kg	no	no	no	no		yes	no		no		rarely (a few times per month)	rarely (a few times per month)	everyday	sometimes (1-2 times per week)	sometimes (1-2 times per week)	everyday	rarely (a few times per month)	usually (3-5 times per week)	usually (3-5 times per week)	usually (3-5 times per week)	sometimes (1-2 times per week)	usually (3-5 times per week)	sometimes (1-2 times per week)	whole	rarely (a few times per month)
MG093	31	F	168	64	vegetable and animal meat	yes	rarely (a few times per month)	bottled water	raw meat | low-carb foods	sometimes (1-2 times per week)	indoor	never	sometimes (1-2 times per week)	beer/cider | liquor	everyday	everyday	5-6 hours	once a day	normal	more than 1 year/never	more than 1 year/never	never	no	change 2-5 kg	no	no	no	yes	both	no	no	flower	no	hypertension |	sometimes (1-2 times per week)	rarely (a few times per month)	everyday	rarely (a few times per month)	usually (3-5 times per week)	everyday	rarely (a few times per month)	usually (3-5 times per week)	everyday	usually (3-5 times per week)	usually (3-5 times per week)	rarely (a few times per month)	rarely (a few times per month)	whole	never
MG098	33	F	156	57	vegetable and animal meat but not consume raw meat	yes	usually (3-5 times per week)	bottled water	none of these choices	never	Never	never	never		everyday	sometimes (1-2 times per week)	less than 5 hours	once a day	normal			never	no	change not more than 2 kg	no	no	no	yes		no	no		no		everyday	rarely (a few times per month)	everyday	sometimes (1-2 times per week)	everyday	usually (3-5 times per week)	sometimes (1-2 times per week)	usually (3-5 times per week)	sometimes (1-2 times per week)	sometimes (1-2 times per week)	sometimes (1-2 times per week)	rarely (a few times per month)	rarely (a few times per month)	whole	never
MG099	54	M	173	50	vegetable and animal meat	yes	rarely (a few times per month)	tap water	none of these choices	rarely (a few times per month)	indoor	never	never		everyday	rarely (a few times per month)	7-8 hours	once a day				never	no	change not more than 2 kg	no	no	no	yes					no			rarely (a few times per month)	usually (3-5 times per week)	rarely (a few times per month)	sometimes (1-2 times per week)	rarely (a few times per month)	rarely (a few times per month)	sometimes (1-2 times per week)	rarely (a few times per month)	usually (3-5 times per week)	usually (3-5 times per week)	rarely (a few times per month)	sometimes (1-2 times per week)	whole	never
MG100	41	F	155	69	vegetable and animal meat	yes	sometimes (1-2 times per week)		none of these choices	sometimes (1-2 times per week)	indoor	never	rarely (a few times per month)	beer/cider | liquor	everyday	never	6-7 hours	twice a day	normal	within 1 last month	2-6 months ago	never	no	change not more than 2 kg	no	no	no	yes		yes	no	wild animal | sunlight	no		everyday	sometimes (1-2 times per week)	usually (3-5 times per week)	usually (3-5 times per week)	usually (3-5 times per week)	rarely (a few times per month)	sometimes (1-2 times per week)	sometimes (1-2 times per week)	sometimes (1-2 times per week)		rarely (a few times per month)	rarely (a few times per month)	rarely (a few times per month)	whole	never
MG102	23	M	168	50	vegetable and animal meat but not consume raw meat	yes	rarely (a few times per month)	bottled water	none of these choices	rarely (a few times per month)	indoor	sometimes (1-2 times per week)	sometimes (1-2 times per week)	beer/cider	everyday	rarely (a few times per month)	7-8 hours	once a day	normal	more than 1 year/never		never	no	change not more than 2 kg	no	no	no	yes		no	no	flower |	yes		rarely (a few times per month)	rarely (a few times per month)	everyday	rarely (a few times per month)	sometimes (1-2 times per week)	usually (3-5 times per week)	rarely (a few times per month)	usually (3-5 times per week)	sometimes (1-2 times per week)	usually (3-5 times per week)	rarely (a few times per month)	sometimes (1-2 times per week)	usually (3-5 times per week)	whole	rarely (a few times per month)
MG105	19	M	160	50	vegetable and animal meat but not consume raw meat	no	rarely (a few times per month)		none of these choices	sometimes (1-2 times per week)	indoor	never	never		everyday	usually (3-5 times per week)	5-6 hours	once a day	normal	7 months - 1 year ago	2-6 months ago	never	no	change 2-5 kg	no	no	no		both	no	no		no		sometimes (1-2 times per week)	usually (3-5 times per week)	everyday	rarely (a few times per month)	everyday	rarely (a few times per month)	everyday	everyday	everyday	usually (3-5 times per week)	sometimes (1-2 times per week)	rarely (a few times per month)	sometimes (1-2 times per week)	whole	never
MG106	40	F	150	76	vegetable and animal meat but not consume raw meat	yes	rarely (a few times per month)	bottled water		sometimes (1-2 times per week)	indoor	never	rarely (a few times per month)	beer/cider | white wine | red wine | cocktail	everyday	rarely (a few times per month)	6-7 hours	twice a day					no												rarely (a few times per month)	everyday	everyday	rarely (a few times per month)	everyday	rarely (a few times per month)	never	rarely (a few times per month)	sometimes (1-2 times per week)	usually (3-5 times per week)	sometimes (1-2 times per week)	sometimes (1-2 times per week)	rarely (a few times per month)	whole	rarely (a few times per month)
MG112	51	M	175	67	vegetable and animal meat but not consume raw meat	no	rarely (a few times per month)	bottled water	none of these choices	usually (3-5 times per week)	indoor	never	never		everyday	everyday	6-7 hours	once a day	normal	more than 1 year/never		never	no	change not more than 2 kg	no	no	no	yes		no	no		no		rarely (a few times per month)	everyday	everyday	rarely (a few times per month)	sometimes (1-2 times per week)	sometimes (1-2 times per week)	never	sometimes (1-2 times per week)	sometimes (1-2 times per week)	everyday	rarely (a few times per month)	rarely (a few times per month)	rarely (a few times per month)	whole	never
MG114	30	M	167	66	vegetable and animal meat	yes	everyday	tap water	none of these choices	never		never	never		everyday	rarely (a few times per month)	6-7 hours	once a day	normal	2-6 months ago		never	no	change more than 5 kg	no	no	no	yes		no	no		no		usually (3-5 times per week)	usually (3-5 times per week)	usually (3-5 times per week)	usually (3-5 times per week)	sometimes (1-2 times per week)	usually (3-5 times per week)	sometimes (1-2 times per week)	usually (3-5 times per week)	sometimes (1-2 times per week)	sometimes (1-2 times per week)	rarely (a few times per month)	sometimes (1-2 times per week)	usually (3-5 times per week)	whole	never
MG115	60	F	168	58	vegetable and animal meat	yes			none of these choices	sometimes (1-2 times per week)	indoor	never	never		everyday	everyday	5-6 hours	once a day	normal	7 months - 1 year ago		never	no	change 2-5 kg	no	no	no	yes		no	no	flower |	no	diabetes	rarely (a few times per month)	rarely (a few times per month)	everyday	rarely (a few times per month)	everyday	rarely (a few times per month)	everyday	sometimes (1-2 times per week)	usually (3-5 times per week)	sometimes (1-2 times per week)	rarely (a few times per month)	everyday	rarely (a few times per month)	whole	never
MG116	33	F	160	57	vegetable and animal meat but not consume raw meat	yes	never	bottled water	none of these choices	sometimes (1-2 times per week)	indoor	never	never		everyday	rarely (a few times per month)	less than 5 hours	once a day	normal	within 1 last month	2-6 months ago	never	no	change not more than 2 kg	no	yes	no	no		yes	no		no		rarely (a few times per month)	usually (3-5 times per week)	usually (3-5 times per week)	everyday	everyday	never	everyday	sometimes (1-2 times per week)	never	rarely (a few times per month)	sometimes (1-2 times per week)	rarely (a few times per month)	rarely (a few times per month)	whole	never
MG118	43	F	163	53	vegetable and animal meat but not consume raw meat	no	usually (3-5 times per week)	tap water	raw meat | low-carb foods	sometimes (1-2 times per week)	outdoor	never	rarely (a few times per month)	beer/cider	everyday	everyday	7-8 hours	less than one time per day	quite liquid	more than 1 year/never		never	no	change not more than 2 kg	no	no	no	yes	breast milk	no	no		no	gastrointestinal inflammation	usually (3-5 times per week)	never	everyday	usually (3-5 times per week)	usually (3-5 times per week)	sometimes (1-2 times per week)	sometimes (1-2 times per week)	rarely (a few times per month)	rarely (a few times per month)	usually (3-5 times per week)	rarely (a few times per month)	rarely (a few times per month)	rarely (a few times per month)	whole	never
MG119	42	F	160	50	Vegan	yes	sometimes (1-2 times per week)	bottled water		everyday	outdoor	never	rarely (a few times per month)	beer/cider | white wine | red wine	everyday	never	5-6 hours	twice a day	normal	7 months - 1 year ago		used or using (drinks)	no	change more than 5 kg	no	no	no	yes		no	no		no		everyday	sometimes (1-2 times per week)	everyday	rarely (a few times per month)	usually (3-5 times per week)	rarely (a few times per month)	sometimes (1-2 times per week)								sometimes (1-2 times per week)
MG120	27	F	158	58	vegetable and animal meat	yes	sometimes (1-2 times per week)	bottled water	none of these choices	rarely (a few times per month)	indoor	never	never		everyday	rarely (a few times per month)	less than 5 hours	once a day	normal	2-6 months ago	more than 1 year/never	used or using (pills)	no	change 2-5 kg	no	no	yes	no	formulated milk	no	no	flower	yes	gastrointestinal inflammation	usually (3-5 times per week)	sometimes (1-2 times per week)	usually (3-5 times per week)	rarely (a few times per month)	usually (3-5 times per week)	usually (3-5 times per week)	rarely (a few times per month)	usually (3-5 times per week)	sometimes (1-2 times per week)	usually (3-5 times per week)	sometimes (1-2 times per week)	usually (3-5 times per week)	rarely (a few times per month)	whole	rarely (a few times per month)
MG124	19	F	164	63	vegetable and animal meat	yes	rarely (a few times per month)	bottled water	raw meat	rarely (a few times per month)	outdoor	never	rarely (a few times per month)	beer/cider	everyday	sometimes (1-2 times per week)	7-8 hours	less than one time per day	quite liquid	7 months - 1 year ago	7 months - 1 year ago	never	no	change not more than 2 kg	no	no	no	no	formulated milk	no	no	wild animal | ivy	no		rarely (a few times per month)	rarely (a few times per month)	usually (3-5 times per week)	rarely (a few times per month)	rarely (a few times per month)	rarely (a few times per month)	rarely (a few times per month)	sometimes (1-2 times per week)	sometimes (1-2 times per week)	usually (3-5 times per week)	sometimes (1-2 times per week)	sometimes (1-2 times per week)	sometimes (1-2 times per week)	whole	never
MG126	56	F	166	53	vegetable and animal meat	yes	everyday	bottled water	none of these choices	rarely (a few times per month)	depend on season	never	never		everyday	rarely (a few times per month)	5-6 hours	four times a day	quite hard	2-6 months ago		never	no	change not more than 2 kg	yes	no	no	yes		no	no	ivy | sunlight	yes		everyday	rarely (a few times per month)	usually (3-5 times per week)	sometimes (1-2 times per week)	everyday	everyday	never	rarely (a few times per month)	everyday	rarely (a few times per month)	rarely (a few times per month)	rarely (a few times per month)	rarely (a few times per month)	whole	rarely (a few times per month)
MG130	41	F	150	57	vegetable and animal meat	no	sometimes (1-2 times per week)	bottled water	low-carb foods	usually (3-5 times per week)	both	never	rarely (a few times per month)	others	everyday	usually (3-5 times per week)	6-7 hours	twice a day	normal	2-6 months ago		never	no	change more than 5 kg	no	no	no	yes		no	no		no	diabetes	everyday	sometimes (1-2 times per week)	everyday	usually (3-5 times per week)	everyday	sometimes (1-2 times per week)	everyday	rarely (a few times per month)	sometimes (1-2 times per week)	usually (3-5 times per week)	usually (3-5 times per week)	rarely (a few times per month)	rarely (a few times per month)	whole	never
MG134	23	F	170	59	vegetable and animal meat	no	everyday	bottled water	low-carb foods	usually (3-5 times per week)	depend on season	never	rarely (a few times per month)	beer/cider	everyday	rarely (a few times per month)	6-7 hours	once a day	normal	within 1 last week	7 months - 1 year ago		no	change not more than 2 kg	no	yes	yes	yes	both	no	no	pet | ivy | flower	yes		rarely (a few times per month)	everyday	everyday	rarely (a few times per month)	rarely (a few times per month)	everyday	rarely (a few times per month)	usually (3-5 times per week)	usually (3-5 times per week)	usually (3-5 times per week)	sometimes (1-2 times per week)	sometimes (1-2 times per week)	sometimes (1-2 times per week)	whole	rarely (a few times per month)
MG135	40	F	150	45	vegetable and animal meat	no	sometimes (1-2 times per week)	bottled water	none of these choices	sometimes (1-2 times per week)	depend on season	never	never		everyday	rarely (a few times per month)	5-6 hours	four times a day				never	no	change not more than 2 kg	no	no	no	no		no	no		no		usually (3-5 times per week)	usually (3-5 times per week)	usually (3-5 times per week)	sometimes (1-2 times per week)	sometimes (1-2 times per week)	sometimes (1-2 times per week)	sometimes (1-2 times per week)	rarely (a few times per month)	sometimes (1-2 times per week)	sometimes (1-2 times per week)	rarely (a few times per month)	rarely (a few times per month)	rarely (a few times per month)	whole	rarely (a few times per month)
MG138	41	F	157	57	vegetable and animal meat	yes	sometimes (1-2 times per week)	bottled water	none of these choices	sometimes (1-2 times per week)	indoor	never	never		everyday	everyday	6-7 hours	once a day	normal			never	no	change not more than 2 kg		no	no	no		no	no		no		rarely (a few times per month)	everyday	everyday	rarely (a few times per month)	usually (3-5 times per week)	usually (3-5 times per week)	rarely (a few times per month)	usually (3-5 times per week)	usually (3-5 times per week)	sometimes (1-2 times per week)	sometimes (1-2 times per week)	rarely (a few times per month)	sometimes (1-2 times per week)	whole	never
MG139	31	F	150	47	vegetable and animal meat	yes	sometimes (1-2 times per week)	bottled water	none of these choices	sometimes (1-2 times per week)	indoor	never	never		everyday	usually (3-5 times per week)	5-6 hours	once a day	normal			never	no	change not more than 2 kg	no	no	no	yes		yes	no		no		rarely (a few times per month)	everyday	everyday	sometimes (1-2 times per week)	sometimes (1-2 times per week)	sometimes (1-2 times per week)	sometimes (1-2 times per week)	usually (3-5 times per week)	rarely (a few times per month)	everyday	sometimes (1-2 times per week)	usually (3-5 times per week)	everyday	whole	never
MG141	19	F	163	56	vegetable and animal meat	no	sometimes (1-2 times per week)	bottled water		rarely (a few times per month)	depend on season	never	rarely (a few times per month)	beer/cider | white wine | red wine | liquor	everyday	everyday	6-7 hours	twice a day	normal	within 1 last week	within 1 last month	never	no	change more than 5 kg	no	no	yes	yes	formulated milk	no	no	ivy	yes		everyday	rarely (a few times per month)	usually (3-5 times per week)	usually (3-5 times per week)	usually (3-5 times per week)	usually (3-5 times per week)	usually (3-5 times per week)	sometimes (1-2 times per week)	usually (3-5 times per week)	usually (3-5 times per week)	usually (3-5 times per week)	rarely (a few times per month)	rarely (a few times per month)	whole	never
MG142	19	M	159	56	vegetable and animal meat	yes	rarely (a few times per month)	bottled water	raw meat | low-carb foods	rarely (a few times per month)	outdoor	never	rarely (a few times per month)	beer/cider | white wine | red wine | liquor	everyday	never	5-6 hours	once a day		within 1 last month			no	change 2-5 kg	no	no	yes	yes	both	no	no		no	hypertension | gastrointestinal inflammation	never	sometimes (1-2 times per week)	usually (3-5 times per week)	rarely (a few times per month)	rarely (a few times per month)	rarely (a few times per month)	rarely (a few times per month)	rarely (a few times per month)	rarely (a few times per month)	usually (3-5 times per week)	sometimes (1-2 times per week)	rarely (a few times per month)	sometimes (1-2 times per week)	whole	never
MG147	22	M	175	65	vegetable and animal meat	yes	rarely (a few times per month)	bottled water	none of these choices	sometimes (1-2 times per week)	depend on season	rarely (a few times per month)	rarely (a few times per month)	beer/cider | liquor	everyday	never	5-6 hours	once a day	quite hard	within 1 last week		never	no	change 2-5 kg	no	no	yes	no		yes	no	flower	no		sometimes (1-2 times per week)	usually (3-5 times per week)	everyday	rarely (a few times per month)	rarely (a few times per month)	sometimes (1-2 times per week)	usually (3-5 times per week)	everyday	never	usually (3-5 times per week)	sometimes (1-2 times per week)	usually (3-5 times per week)	usually (3-5 times per week)	whole	never
MG149	23	M	178	72	vegetable and animal meat but not consume raw meat	yes	sometimes (1-2 times per week)	bottled water	low-carb foods	rarely (a few times per month)	indoor	usually (3-5 times per week)	rarely (a few times per month)	beer/cider	everyday	rarely (a few times per month)	less than 5 hours	once a day	normal	2-6 months ago		never	no	change not more than 2 kg	no	no	no	yes		no	no		no		never	rarely (a few times per month)	everyday	sometimes (1-2 times per week)	everyday	everyday	rarely (a few times per month)	everyday	rarely (a few times per month)	sometimes (1-2 times per week)	sometimes (1-2 times per week)	usually (3-5 times per week)	usually (3-5 times per week)	whole	rarely (a few times per month)
MG150	48	M	178	75	vegetable and animal meat	yes	usually (3-5 times per week)	bottled water	raw meat | low-carb foods | halal	never	indoor	never	rarely (a few times per month)	beer/cider | white wine | red wine | cocktail	everyday	everyday	6-7 hours	once a day	normal	2-6 months ago	more than 1 year/never	never	no	change 2-5 kg	no	no	no	yes		no	no		yes	diabetes | hypertension | gastrointestinal inflammation | migraine |	sometimes (1-2 times per week)	sometimes (1-2 times per week)	everyday	usually (3-5 times per week)	everyday	everyday	rarely (a few times per month)	sometimes (1-2 times per week)	everyday	sometimes (1-2 times per week)	sometimes (1-2 times per week)	sometimes (1-2 times per week)	rarely (a few times per month)	whole	never
MG152	26	F	172	66	vegetable and animal meat	no	rarely (a few times per month)	bottled water		sometimes (1-2 times per week)	both	never	rarely (a few times per month)	liquor	everyday	rarely (a few times per month)	5-6 hours	twice a day	normal	within 1 last month	more than 1 year/never	never	no	change not more than 2 kg	no	no	no	yes		no	no		no		rarely (a few times per month)	rarely (a few times per month)	usually (3-5 times per week)	rarely (a few times per month)	usually (3-5 times per week)	sometimes (1-2 times per week)	rarely (a few times per month)	sometimes (1-2 times per week)	sometimes (1-2 times per week)	usually (3-5 times per week)	sometimes (1-2 times per week)	sometimes (1-2 times per week)	sometimes (1-2 times per week)	whole	rarely (a few times per month)
MG155	19	F	164	53	vegetable and animal meat but not consume raw meat	yes	rarely (a few times per month)	bottled water	raw meat	sometimes (1-2 times per week)	indoor	never	rarely (a few times per month)	beer/cider | red wine	everyday	never	5-6 hours	less than one time per day	quite liquid	within 1 last month	more than 1 year/never	never	no	change not more than 2 kg	no	no	no	yes		no	no		no		rarely (a few times per month)	everyday	everyday	rarely (a few times per month)	sometimes (1-2 times per week)	sometimes (1-2 times per week)	everyday	everyday	sometimes (1-2 times per week)	sometimes (1-2 times per week)	everyday	sometimes (1-2 times per week)	sometimes (1-2 times per week)	whole	rarely (a few times per month)
[truncated: 2 more columns]
