# Supplementary material for: Characterization of the Gut Microbiota in Urban Thai Individuals Reveals Enterotype-Specific Signature
Source: Microorganisms. 2023 Jan 5;11(1):136. doi: 10.3390/microorganisms11010136 (PMC9866083; doi:10.3390/microorganisms11010136)
Supplement: Supplementary file 1 [file microorganisms-11-00136-s001.zip › Table S10 - statistical test for differences in diversity of age bmi gender.xlsx]

## Sheet: Sheet1
[1] "PERMANOVA-bray"												A anova.cca: 3 × 5
A anova.cca: 3 × 5													Df	SumOfSqs	R2	F	Pr(>F)
	Df	SumOfSqs	R2	F	Pr(>F)								<dbl>	<dbl>	<dbl>	<dbl>	<dbl>
	<dbl>	<dbl>	<dbl>	<dbl>	<dbl>							meta$age_cat	5	1.16592	0.0429705	0.808197	0.7844
meta$enterotype	1	8.76236	0.443806	75.0057	0.0001							Residual	90	25.9671	0.95703	NA	NA
Residual	94	10.9813	0.556194	NA	NA							Total	95	27.133	1	NA	NA
Total	95	19.7437	1	NA	NA							A anova.cca: 3 × 5
A anova.cca: 3 × 5													Df	SumOfSqs	R2	F	Pr(>F)
	Df	SumOfSqs	R2	F	Pr(>F)								<dbl>	<dbl>	<dbl>	<dbl>	<dbl>
	<dbl>	<dbl>	<dbl>	<dbl>	<dbl>							meta$gender	2	0.490392	0.0180737	0.855894	0.5744
meta$age_cat	5	0.724895	0.0367153	0.686064	0.8451							Residual	93	26.6426	0.981926	NA	NA
Residual	90	19.0188	0.963285	NA	NA							Total	95	27.133	1	NA	NA
Total	95	19.7437	1	NA	NA							A anova.cca: 3 × 5
A anova.cca: 3 × 5													Df	SumOfSqs	R2	F	Pr(>F)
	Df	SumOfSqs	R2	F	Pr(>F)								<dbl>	<dbl>	<dbl>	<dbl>	<dbl>
	<dbl>	<dbl>	<dbl>	<dbl>	<dbl>							meta$BMI_cat	4	1.01423	0.03738	0.883418	0.6214
meta$gender	2	0.295538	0.0149687	0.706623	0.6747							Residual	91	26.1188	0.96262	NA	NA
Residual	93	19.4481	0.985031	NA	NA							Total	95	27.133	1	NA	NA
Total	95	19.7437	1	NA	NA
A anova.cca: 3 × 5
	Df	SumOfSqs	R2	F	Pr(>F)
	<dbl>	<dbl>	<dbl>	<dbl>	<dbl>
meta$BMI_cat	4	0.698432	0.035375	0.834294	0.6141
Residual	91	19.0453	0.964625	NA	NA
Total	95	19.7437	1	NA	NA
A anova.cca: 3 × 5
	Df	SumOfSqs	R2	F	Pr(>F)
	<dbl>	<dbl>	<dbl>	<dbl>	<dbl>
meta$typeFoodCons	3	0.431297	0.0218448	0.684868	0.811
Residual	92	19.3124	0.978155	NA	NA
Total	95	19.7437	1	NA	NA
A anova.cca: 3 × 5
	Df	SumOfSqs	R2	F	Pr(>F)
	<dbl>	<dbl>	<dbl>	<dbl>	<dbl>
meta$multivitCons	2	0.1785	0.00904084	0.424235	0.9447
Residual	93	19.5652	0.990959	NA	NA
Total	95	19.7437	1	NA	NA
A anova.cca: 3 × 5
	Df	SumOfSqs	R2	F	Pr(>F)
	<dbl>	<dbl>	<dbl>	<dbl>	<dbl>
meta$freqPrebiotics	5	1.38	0.0698956	1.35267	0.1337
Residual	90	18.3637	0.930104	NA	NA
Total	95	19.7437	1	NA	NA
A anova.cca: 3 × 5
	Df	SumOfSqs	R2	F	Pr(>F)
	<dbl>	<dbl>	<dbl>	<dbl>	<dbl>
meta$waterSource	2	0.266027	0.013474	0.635101	0.76
Residual	93	19.4777	0.986526	NA	NA
Total	95	19.7437	1	NA	NA
A anova.cca: 3 × 5
	Df	SumOfSqs	R2	F	Pr(>F)
	<dbl>	<dbl>	<dbl>	<dbl>	<dbl>
meta$freqExercise	5	0.55108	0.0279117	0.516837	0.9791
Residual	90	19.1926	0.972088	NA	NA
Total	95	19.7437	1	NA	NA
A anova.cca: 3 × 5
	Df	SumOfSqs	R2	F	Pr(>F)
	<dbl>	<dbl>	<dbl>	<dbl>	<dbl>
meta$typeExercise	5	0.995684	0.0504305	0.955958	0.4826
Residual	90	18.748	0.949569	NA	NA
Total	95	19.7437	1	NA	NA
A anova.cca: 3 × 5
	Df	SumOfSqs	R2	F	Pr(>F)
	<dbl>	<dbl>	<dbl>	<dbl>	<dbl>
meta$freqSmoking	4	0.682894	0.034588	0.815068	0.736
Residual	91	19.0608	0.965412	NA	NA
Total	95	19.7437	1	NA	NA
A anova.cca: 3 × 5
	Df	SumOfSqs	R2	F	Pr(>F)
	<dbl>	<dbl>	<dbl>	<dbl>	<dbl>
meta$freqLiquorCons	4	0.483636	0.0244957	0.571272	0.9463
Residual	91	19.26	0.975504	NA	NA
Total	95	19.7437	1	NA	NA
A anova.cca: 3 × 5
	Df	SumOfSqs	R2	F	Pr(>F)
	<dbl>	<dbl>	<dbl>	<dbl>	<dbl>
meta$freqFloss	5	1.1183	0.056641	1.08075	0.3443
Residual	90	18.6254	0.943359	NA	NA
Total	95	19.7437	1	NA	NA
A anova.cca: 3 × 5
	Df	SumOfSqs	R2	F	Pr(>F)
	<dbl>	<dbl>	<dbl>	<dbl>	<dbl>
meta$sleepTime	4	0.786891	0.0398553	0.944345	0.4923
Residual	91	18.9568	0.960145	NA	NA
Total	95	19.7437	1	NA	NA
A anova.cca: 3 × 5
	Df	SumOfSqs	R2	F	Pr(>F)
	<dbl>	<dbl>	<dbl>	<dbl>	<dbl>
meta$freqPoop	5	0.908736	0.0460267	0.868452	0.6258
Residual	90	18.8349	0.953973	NA	NA
Total	95	19.7437	1	NA	NA
A anova.cca: 3 × 5
	Df	SumOfSqs	R2	F	Pr(>F)
	<dbl>	<dbl>	<dbl>	<dbl>	<dbl>
meta$typePoop	3	0.649648	0.0329041	1.04339	0.3736
Residual	92	19.094	0.967096	NA	NA
Total	95	19.7437	1	NA	NA
A anova.cca: 3 × 5
	Df	SumOfSqs	R2	F	Pr(>F)
	<dbl>	<dbl>	<dbl>	<dbl>	<dbl>
meta$latestAntibioticUsage	5	1.09045	0.0552301	1.05226	0.3754
Residual	90	18.6532	0.94477	NA	NA
Total	95	19.7437	1	NA	NA
A anova.cca: 3 × 5
	Df	SumOfSqs	R2	F	Pr(>F)
	<dbl>	<dbl>	<dbl>	<dbl>	<dbl>
meta$latestFluVaccinated	4	0.829317	0.0420042	0.997494	0.4292
Residual	91	18.9144	0.957996	NA	NA
Total	95	19.7437	1	NA	NA
A anova.cca: 3 × 5
	Df	SumOfSqs	R2	F	Pr(>F)
	<dbl>	<dbl>	<dbl>	<dbl>	<dbl>
meta$typeHormones	3	0.303618	0.015378	0.478956	0.9795
Residual	92	19.4401	0.984622	NA	NA
Total	95	19.7437	1	NA	NA
A anova.cca: 3 × 5
	Df	SumOfSqs	R2	F	Pr(>F)
	<dbl>	<dbl>	<dbl>	<dbl>	<dbl>
meta$weightChanged	3	0.297889	0.0150878	0.469781	0.9582
Residual	92	19.4458	0.984912	NA	NA
Total	95	19.7437	1	NA	NA
A anova.cca: 3 × 5
	Df	SumOfSqs	R2	F	Pr(>F)
	<dbl>	<dbl>	<dbl>	<dbl>	<dbl>
meta$tonsilSurgery	2	0.513494	0.026008	1.24166	0.2375
Residual	93	19.2302	0.973992	NA	NA
Total	95	19.7437	1	NA	NA
A anova.cca: 3 × 5
	Df	SumOfSqs	R2	F	Pr(>F)
	<dbl>	<dbl>	<dbl>	<dbl>	<dbl>
meta$appendixSurgery	2	0.39471	0.0199917	0.948579	0.4468
Residual	93	19.349	0.980008	NA	NA
Total	95	19.7437	1	NA	NA
A anova.cca: 3 × 5
	Df	SumOfSqs	R2	F	Pr(>F)
	<dbl>	<dbl>	<dbl>	<dbl>	<dbl>
meta$medDiag	2	0.366642	0.0185701	0.879848	0.5026
Residual	93	19.377	0.98143	NA	NA
Total	95	19.7437	1	NA	NA
A anova.cca: 3 × 5
	Df	SumOfSqs	R2	F	Pr(>F)
	<dbl>	<dbl>	<dbl>	<dbl>	<dbl>
meta$birthDelivery	2	0.390884	0.0197979	0.939197	0.4378
Residual	93	19.3528	0.980202	NA	NA
Total	95	19.7437	1	NA	NA
A anova.cca: 3 × 5
	Df	SumOfSqs	R2	F	Pr(>F)
	<dbl>	<dbl>	<dbl>	<dbl>	<dbl>
meta$typeInfantFood	3	0.484362	0.0245325	0.771251	0.6768
Residual	92	19.2593	0.975467	NA	NA
Total	95	19.7437	1	NA	NA
A anova.cca: 3 × 5
	Df	SumOfSqs	R2	F	Pr(>F)
	<dbl>	<dbl>	<dbl>	<dbl>	<dbl>
meta$lactoseIntol	2	0.533744	0.0270336	1.29199	0.2225
Residual	93	19.2099	0.972966	NA	NA
Total	95	19.7437	1	NA	NA
A anova.cca: 3 × 5
	Df	SumOfSqs	R2	F	Pr(>F)
	<dbl>	<dbl>	<dbl>	<dbl>	<dbl>
meta$glutenIntol	2	0.199549	0.010107	0.474773	0.9681
Residual	93	19.5441	0.989893	NA	NA
Total	95	19.7437	1	NA	NA
A anova.cca: 3 × 5
	Df	SumOfSqs	R2	F	Pr(>F)
	<dbl>	<dbl>	<dbl>	<dbl>	<dbl>
meta$seasonalAllergy	2	0.430202	0.0217893	1.03577	0.3617
Residual	93	19.3135	0.978211	NA	NA
Total	95	19.7437	1	NA	NA
A anova.cca: 3 × 5
	Df	SumOfSqs	R2	F	Pr(>F)
	<dbl>	<dbl>	<dbl>	<dbl>	<dbl>
meta$freqSelfCooked	5	0.863204	0.0437205	0.822948	0.6733
Residual	90	18.8805	0.95628	NA	NA
Total	95	19.7437	1	NA	NA
A anova.cca: 3 × 5
	Df	SumOfSqs	R2	F	Pr(>F)
	<dbl>	<dbl>	<dbl>	<dbl>	<dbl>
meta$freqInstantFoods	5	0.803794	0.0407114	0.763906	0.7682
Residual	90	18.9399	0.959289	NA	NA
Total	95	19.7437	1	NA	NA
A anova.cca: 3 × 5
	Df	SumOfSqs	R2	F	Pr(>F)
	<dbl>	<dbl>	<dbl>	<dbl>	<dbl>
meta$freqEggMeatCons	3	1.05334	0.0533506	1.72829	0.0617
Residual	92	18.6903	0.946649	NA	NA
Total	95	19.7437	1	NA	NA
A anova.cca: 3 × 5
	Df	SumOfSqs	R2	F	Pr(>F)
	<dbl>	<dbl>	<dbl>	<dbl>	<dbl>
meta$freqGrainCons	5	1.10006	0.0557171	1.06208	0.3584
Residual	90	18.6436	0.944283	NA	NA
Total	95	19.7437	1	NA	NA
A anova.cca: 3 × 5
	Df	SumOfSqs	R2	F	Pr(>F)
	<dbl>	<dbl>	<dbl>	<dbl>	<dbl>
meta$freqVegCons	5	0.902799	0.045726	0.862506	0.633
Residual	90	18.8409	0.954274	NA	NA
Total	95	19.7437	1	NA	NA
A anova.cca: 3 × 5
	Df	SumOfSqs	R2	F	Pr(>F)
	<dbl>	<dbl>	<dbl>	<dbl>	<dbl>
meta$freqDairyCons	5	0.859945	0.0435555	0.819701	0.6723
Residual	90	18.8837	0.956445	NA	NA
Total	95	19.7437	1	NA	NA
A anova.cca: 3 × 5
	Df	SumOfSqs	R2	F	Pr(>F)
	<dbl>	<dbl>	<dbl>	<dbl>	<dbl>
meta$freqMilkSubstituteCons	5	0.675639	0.0342205	0.637795	0.887
Residual	90	19.068	0.96578	NA	NA
Total	95	19.7437	1	NA	NA
A anova.cca: 3 × 5
	Df	SumOfSqs	R2	F	Pr(>F)
	<dbl>	<dbl>	<dbl>	<dbl>	<dbl>
meta$freqDessertCons	4	0.394704	0.0199914	0.464082	0.9799
Residual	91	19.349	0.980009	NA	NA
Total	95	19.7437	1	NA	NA
A anova.cca: 3 × 5
	Df	SumOfSqs	R2	F	Pr(>F)
	<dbl>	<dbl>	<dbl>	<dbl>	<dbl>
meta$freqRedMeatCons	5	0.99719	0.0505068	0.957482	0.4834
Residual	90	18.7465	0.949493	NA	NA
Total	95	19.7437	1	NA	NA
A anova.cca: 3 × 5
	Df	SumOfSqs	R2	F	Pr(>F)
	<dbl>	<dbl>	<dbl>	<dbl>	<dbl>
meta$freqPoultryCons	5	1.42029	0.0719362	1.39522	0.1096
Residual	90	18.3234	0.928064	NA	NA
Total	95	19.7437	1	NA	NA
A anova.cca: 3 × 5
	Df	SumOfSqs	R2	F	Pr(>F)
	<dbl>	<dbl>	<dbl>	<dbl>	<dbl>
meta$freqSeafoodCons	5	0.711357	0.0360296	0.672772	0.908
Residual	90	19.0323	0.96397	NA	NA
Total	95	19.7437	1	NA	NA
A anova.cca: 3 × 5
	Df	SumOfSqs	R2	F	Pr(>F)
	<dbl>	<dbl>	<dbl>	<dbl>	<dbl>
meta$freqSaltSnackCOns	4	0.605664	0.0306763	0.719972	0.7807
Residual	91	19.138	0.969324	NA	NA
Total	95	19.7437	1	NA	NA
A anova.cca: 3 × 5
	Df	SumOfSqs	R2	F	Pr(>F)
	<dbl>	<dbl>	<dbl>	<dbl>	<dbl>
meta$freqSweetSnackCons	4	1.11805	0.0566282	1.36563	0.153
Residual	91	18.6256	0.943372	NA	NA
Total	95	19.7437	1	NA	NA
A anova.cca: 3 × 5
	Df	SumOfSqs	R2	F	Pr(>F)
	<dbl>	<dbl>	<dbl>	<dbl>	<dbl>
meta$typeEggCons	2	0.273331	0.013844	0.652782	0.7548
Residual	93	19.4704	0.986156	NA	NA
Total	95	19.7437	1	NA	NA
A anova.cca: 3 × 5
	Df	SumOfSqs	R2	F	Pr(>F)
	<dbl>	<dbl>	<dbl>	<dbl>	<dbl>
meta$freqSoftDrinksCons	3	0.635016	0.032163	1.01911	0.3961
Residual	92	19.1087	0.967837	NA	NA
Total	95	19.7437	1	NA	NA
A anova.cca: 3 × 5
	Df	SumOfSqs	R2	F	Pr(>F)
	<dbl>	<dbl>	<dbl>	<dbl>	<dbl>
meta$freqAtfSweetCons	5	0.888313	0.0449923	0.848015	0.6246
Residual	90	18.8554	0.955008	NA	NA
Total	95	19.7437	1	NA	NA
A anova.cca: 3 × 5
	Df	SumOfSqs	R2	F	Pr(>F)
	<dbl>	<dbl>	<dbl>	<dbl>	<dbl>
meta$freq1LWaterCons	5	1.08723	0.0550674	1.04898	0.3818
Residual	90	18.6565	0.944933	NA	NA
Total	95	19.7437	1	NA	NA

## Sheet: Sheet2
Variable	Answer	Statistical test for differences in alpha-diversity				Statistical test for beta-diversity
		Chao1 index	Pielou index	Shannon index	Simpson index	Bray-Curtis index	Jaccard index
age_category	18 ≤ age ≤ 25:25 < age ≤ 35:35 < age ≤ 45:45 < age ≤ 55: > 55 years old	Kruskal-Wallis rank sum test, p-value = 0.1831	Kruskal-Wallis rank sum test, p-value = 0.5803	Kruskal-Wallis rank sum test, p-value = 0.5197	Kruskal-Wallis rank sum test, p-value = 0.3388	PERMANOVA test, p-value = 0.8451	PERMANOVA test, p-value = 0.7844
BMI	Underweight (<18.5 kg/m2):Normal (18.5-24.9 kg/m2):Overweight (25-29.9 kg/m2):Obese (>30 kg/m2)	Kruskal-Wallis rank sum test, p-value = 0.22	Kruskal-Wallis rank sum test, p-value = 0.2865	Kruskal-Wallis rank sum test, p-value = 0.2331	Kruskal-Wallis rank sum test, p-value = 0.203	PERMANOVA test, p-value = 0.6141	PERMANOVA test, p-value = 0.6214
gender	Male:Female	Wilcoxon rank sum test, p-value = 0.6074	Wilcoxon rank sum test, p-value = 0.4551	Wilcoxon rank sum test, p-value = 0.3511	Wilcoxon rank sum test, p-value = 0.5427	PERMANOVA test, p-value = 0.6747	PERMANOVA test, p-value = 0.5744
